# Supplementary material for: Clinical profile and outcomes of acute cardiorenal syndrome type-5 in sepsis: An eight-year cohort study
Source: PLoS One. 2018 Jan 9;13(1):e0190965. doi: 10.1371/journal.pone.0190965 (PMC5760054; doi:10.1371/journal.pone.0190965)
Supplement: S1 Table — (XLSX) [file pone.0190965.s001.xlsx]

## Sheet: Sepsis_CRS_OnlyIncluded_602of17
Age	Gender	Height	Weight	BMI	BSA	Hypertension	Diabetes	Hyperlipidemia	Coronary Artery Disease	Peripheral Vascular Disease	Congenital HD	Atrial Fibrillation	Other arrhythmias	Valvular Heart Disease	Valve replacement	Pulmonary Hypertension	Prior VTE	Prior PE	Prior DVT	Obstructive Sleep Apnea	COPD	Chronic Lung Disease	Tobacco abuse	CKD	ESRD	Thyroid disease	Liver Disease	PUD	CVA/TIA	Dementia	Solid malignancy	Leukemia	Lymphoma	AIDS	Substance abuse	Asthma	ILD	CTD	Hemiplegia/Paraplegia	Moderate-Severe liver disease	Metastatic Cancer	Age points for charlson of Charlson Score data 2	Charlson Comorbid Index	APACHE III Score	SOFA Score	Respiratory Failure	Pneumonia	Aspiration	ARDS_48 hours
71.8573	0	160	86.2	33.6719	1.95732	0	0	0	0	0	0	0	0	0	0	0	0	0	0	0	0	1	0	0	0	0	0	0	0	0	0	0	0	0	0	1	0	0	0	0	0	4	5	88	3	0	0	0	0
59.4708	0	160	109.9	42.9297	2.21008	0	0	0	0	0	0	0	0	0	0	0	1	0	1	0	1	1	0	0	0	0	0	0	0	0	2	0	0	0	0	0	0	0	0	0	6	2	11	60	2	0	1	0	0
59.4388	0	156	63.8	26.2163	1.66273	1	0	0	0	0	0	0	0	0	0	0	0	0	0	0	1	1	0	0	0	0	0	0	0	0	0	0	0	0	1	0	0	0	0	0	0	2	3	72	8	1	1	0	0
83.9533	1	170	70.5	24.3945	1.8246	1	0	0	0	0	0	0	1	0	0	0	0	0	0	1	1	1	0	0	0	0	0	0	0	0	2	0	0	0	0	0	0	0	0	0	0	5	8	116	9	0	1	0	0
82.9867	1	167.6	70.7	25.1693	1.81424	1	0	1	1	0	0	0	1	0	0	0	0	0	0	0	0	0	0	0	0	0	0	0	0	0	0	0	0	0	0	0	0	1	0	0	0	5	7	105	8	1	0	1	0
68.856	0	162.6	65.1	24.6229	1.71474	1	1	1	0	0	0	0	0	0	0	0	0	0	0	0	0	0	0	0	0	0	0	0	0	1	0	0	0	0	0	0	0	0	0	0	0	3	5	66	2	0	0	0	0
63.5481	0	163	42	15.8079	1.37901	1	0	1	1	0	0	1	1	0	0	0	0	0	0	0	1	1	0	0	0	1	0	0	0	0	0	0	0	0	0	0	0	0	0	0	0	3	4	73	12	1	0	0	0
64.9403	0	170	62.3	21.5571	1.71521	1	0	1	0	0	0	0	0	0	0	0	0	0	0	0	1	1	0	0	0	0	0	0	1	0	2	0	0	0	0	0	0	0	0	0	6	3	13	102	8	1	0	0	1
79.9988	0	158	82.4	33.0075	1.9017	0	0	1	0	0	0	0	0	0	0	0	0	0	0	0	0	0	0	0	0	0	0	0	0	0	2	0	0	0	0	0	0	0	0	0	0	4	6	64	9	0	1	0	0
79.9908	0	140	57.4	29.2857	1.49406	1	1	0	1	0	0	1	1	0	0	0	1	1	1	0	0	0	0	0	0	0	0	0	1	0	0	0	0	0	0	0	0	0	0	0	0	4	7	132	9	0	1	0	1
72.9185	1	154	51.9	21.884	1.49002	1	1	0	0	0	0	0	0	0	0	0	0	0	0	0	0	0	1	0	0	1	0	1	0	0	2	0	0	0	1	0	0	0	0	0	0	4	8	91	6	0	0	1	1
75.2272	0	162	68.4	26.0631	1.75442	0	0	0	0	0	0	0	0	0	0	0	0	0	0	0	0	1	0	0	0	0	0	0	0	0	2	0	0	0	0	1	0	0	0	0	0	4	7	111	10	0	0	0	0
80.6537	0	162	46.3	17.6421	1.44343	0	0	0	0	0	0	0	0	0	0	0	0	0	0	0	1	1	0	0	0	0	0	0	0	0	0	0	0	0	0	0	0	0	0	0	0	5	6	75	7	0	0	0	0
84.6644	0	160	60.3	23.5547	1.63707	1	0	0	0	1	0	0	0	0	0	0	1	0	1	1	0	0	0	0	0	0	0	0	0	1	2	0	0	0	0	0	0	0	0	0	6	5	16	137	12	0	1	0	1
25.4889	0	181	50.2	15.3231	1.58869	0	0	0	0	0	0	0	0	0	0	0	1	0	1	0	0	0	0	0	0	0	0	0	0	0	2	0	0	0	0	0	0	0	0	0	6	0	8	80	7	0	1	0	0
39.2082	0	162	51.4	19.5854	1.52086	1	1	0	0	0	0	0	0	0	0	0	0	0	0	0	1	1	0	0	0	0	1	0	0	0	0	0	0	0	0	1	0	1	0	3	0	0	9	47	1	0	1	0	0
68.5848	0	163	70.3	26.4594	1.7841	0	0	0	0	0	0	0	0	0	0	0	0	0	0	0	0	0	0	0	0	0	0	0	0	0	0	0	0	0	0	0	0	0	0	0	0	3	3	71	1	0	1	0	0
65.0887	0	161	54	20.8325	1.55403	0	0	0	0	0	0	0	0	0	0	0	0	0	0	0	1	1	0	0	0	0	0	0	0	0	0	0	0	0	0	0	0	0	0	0	0	3	4	69	8	0	1	0	0
72.6013	0	176	82.6	26.6658	2.00953	0	1	1	0	1	0	0	1	0	0	0	0	0	0	0	1	1	1	0	0	0	0	0	0	0	2	0	0	0	1	0	0	0	0	0	6	4	17	56	4	1	1	0	0
75.2731	1	173	71	23.7228	1.84714	0	0	0	0	0	0	0	0	0	0	0	0	0	0	0	0	0	0	0	0	0	0	0	0	0	2	0	0	0	0	0	0	1	0	0	0	4	7	66	10	0	1	0	0
71.1419	1	184	79.8	23.5704	2.01957	0	0	1	0	0	0	0	0	0	0	0	1	0	1	0	0	0	0	0	0	0	0	0	1	0	2	0	0	0	0	0	0	0	0	0	6	4	13	89	4	0	1	0	0
74.2111	0	160	40.1	15.6641	1.335	1	0	1	0	0	0	0	0	0	0	1	1	1	0	1	0	0	0	0	0	1	0	0	0	0	2	0	0	0	0	0	0	0	0	0	6	4	12	93	9	0	1	1	1
76.3505	0	158	75.8	30.3637	1.82395	1	1	1	1	0	0	0	1	1	1	0	0	0	0	0	0	0	0	0	0	1	0	0	0	0	2	0	0	0	0	0	0	0	0	0	0	4	7	96	6	1	1	0	0
83.1746	0	165	66.7	24.4995	1.74845	1	1	1	1	0	0	1	1	0	0	0	0	0	0	0	0	0	0	0	0	0	0	0	0	0	2	0	0	0	0	0	0	0	0	0	6	5	14	116	8	0	1	0	1
88.7027	0	155	46	19.1467	1.40732	1	1	1	1	0	0	0	0	0	0	0	0	0	0	0	0	0	0	0	0	1	0	0	0	1	0	0	0	0	0	0	0	0	0	0	0	5	8	102	11	0	0	0	0
89.0736	0	147	49.1	22.722	1.41595	1	1	1	0	0	0	0	1	1	1	0	1	0	1	0	0	0	0	0	0	1	0	0	1	0	2	0	2	0	0	0	0	0	0	0	6	5	17	94	11	0	0	0	1
50.7199	0	152	95.6	41.3781	2.00909	0	0	1	0	0	0	0	0	0	0	0	0	0	0	1	1	1	0	0	0	0	0	0	0	0	0	0	0	0	0	1	0	0	0	0	0	2	3	47	1	0	0	0	0
50.4928	0	163	64.3	24.2011	1.70627	0	1	0	0	0	0	0	1	0	0	0	1	0	1	1	0	1	0	0	0	1	0	0	0	0	0	0	0	0	0	1	0	0	0	0	0	2	4	36	6	0	0	0	1
55.5717	0	166.4	60.4	21.8137	1.67087	0	0	0	0	0	0	0	0	0	0	0	0	0	0	0	0	0	1	0	0	0	0	0	0	0	2	0	0	0	0	0	0	0	0	0	0	2	4	67	6	0	1	0	1
58.1858	0	157	50.4	20.4471	1.48257	0	0	0	0	0	0	0	0	0	0	0	0	0	0	0	0	0	0	0	0	1	0	0	0	0	2	0	0	0	1	0	0	0	0	0	0	2	4	84	7	0	0	1	0
69.4181	0	170	76.4	26.436	1.89942	1	1	1	0	0	0	0	0	0	0	0	0	0	0	0	0	0	0	0	0	0	0	0	0	0	0	0	0	0	0	0	0	0	0	0	0	3	4	73	6	0	1	0	0
64.8096	1	176	64.1	20.6934	1.77025	0	1	0	0	0	0	0	1	1	0	0	0	0	0	0	1	1	1	0	0	0	1	0	0	0	2	0	0	0	0	0	0	0	2	3	0	3	13	116	11	1	0	0	0
64.3963	1	175.3	58.9	19.1669	1.69355	0	0	1	1	0	1	0	1	0	0	0	0	0	0	0	0	0	0	0	0	0	0	0	0	0	0	0	0	0	0	0	0	0	0	0	0	3	4	59	6	0	1	0	1
66.2812	0	158	42.6	17.0646	1.36736	1	0	0	0	0	0	0	1	0	0	0	0	0	0	0	0	0	0	0	0	0	0	0	0	0	0	0	0	0	0	0	0	0	0	0	0	3	3	153	17	0	1	0	1
68.5307	1	175	72.1	23.5429	1.87213	0	0	0	0	0	0	0	0	0	0	0	0	0	0	0	0	0	0	0	0	0	0	0	0	0	0	0	0	0	0	0	0	0	0	0	0	3	3	74	7	0	1	0	1
64.4348	0	171	91.2	31.1891	2.08135	1	0	1	0	0	0	1	0	0	0	0	0	0	0	0	1	1	0	0	0	0	0	0	1	0	2	0	0	0	0	0	0	0	0	0	6	3	14	146	14	0	1	0	1
68.0381	1	164	88	32.7186	2.00222	1	1	1	0	0	0	0	1	0	0	0	1	0	1	0	0	0	0	0	0	1	0	0	0	0	2	0	2	0	0	0	0	0	0	0	0	3	10	135	11	0	0	0	1
64.2675	0	163	95.1	35.7936	2.07507	1	1	0	0	0	0	0	0	0	0	0	1	0	1	1	0	0	0	0	0	0	0	0	0	0	0	0	0	0	0	0	0	0	0	0	0	3	4	37	6	0	0	0	0
68.6139	0	158	56.4	22.5925	1.57332	1	0	0	0	0	0	0	0	0	0	0	0	0	0	0	0	0	0	0	0	0	0	0	0	0	0	0	0	0	0	0	0	0	0	0	0	3	3	47	2	0	0	0	0
79.6492	0	155	77.9	32.4246	1.8314	1	0	0	1	0	0	0	1	0	0	0	0	0	0	0	0	0	0	0	0	0	0	0	0	0	0	0	0	0	0	0	0	0	0	0	0	4	4	58	1	0	0	0	0
72.4261	0	160	73.6	28.75	1.80862	0	0	0	1	0	0	0	0	0	0	0	1	0	1	0	1	1	0	0	0	0	0	0	0	0	0	0	0	0	0	0	0	0	0	0	0	4	5	54	6	0	1	0	1
72.2077	1	180	106.4	32.8395	2.30651	1	0	1	0	0	0	0	1	0	0	0	0	0	0	0	1	1	0	0	0	0	0	1	1	0	0	0	0	0	0	1	0	0	2	0	0	4	9	85	10	0	1	1	0
79.4021	0	153	73.8	31.5263	1.77102	1	0	1	0	0	0	0	1	0	0	0	1	0	1	0	0	0	0	0	0	1	0	0	0	1	0	0	0	0	0	0	0	0	0	0	0	4	5	55	2	0	0	0	0
75.0362	1	170	49.7	17.1972	1.53197	1	0	1	1	0	0	0	1	0	0	0	0	0	0	0	0	0	0	0	0	0	0	0	0	0	2	0	0	0	0	0	0	0	0	0	0	4	6	67	3	0	1	0	0
81.7587	0	167	57.1	20.474	1.62752	0	0	0	0	0	0	1	0	0	0	0	1	0	1	0	0	0	0	0	0	1	0	0	0	0	0	0	0	0	0	0	0	0	0	0	0	5	5	64	5	0	0	0	0
80.777	1	165	79.9	29.348	1.91366	0	0	0	0	0	0	0	0	0	0	0	0	0	0	0	0	0	0	0	0	0	0	0	0	0	2	0	0	0	0	0	0	0	0	0	0	5	7	91	12	0	0	0	1
85.1266	1	168	63.8	22.6049	1.7255	1	0	1	1	0	0	1	1	1	0	0	0	0	0	0	0	0	0	0	0	1	0	0	0	0	2	0	0	0	0	0	0	0	0	0	6	5	13	119	11	1	1	0	0
83.1983	1	149.1	60.3	27.1245	1.58032	1	0	0	0	0	0	1	1	0	0	0	0	0	0	1	0	0	0	0	0	0	0	0	0	1	2	0	0	0	0	0	0	0	2	0	0	5	10	88	10	1	0	0	0
51.4008	0	172	52.7	17.8137	1.58679	1	0	0	0	0	0	0	0	0	0	0	0	0	0	0	0	0	0	0	0	0	0	0	0	0	0	0	0	0	1	0	0	0	0	0	0	2	2	58	4	0	1	0	0
59.5564	0	149	78.2	35.2236	1.79906	0	1	1	1	0	1	0	1	1	1	1	0	0	0	1	1	1	1	0	0	0	0	0	0	0	2	2	2	0	0	0	0	0	0	0	0	2	12	63	4	0	0	0	0
59.5968	1	172	65.4	22.1065	1.76767	1	0	1	0	0	0	0	0	0	0	0	0	0	0	0	1	1	0	0	0	0	0	0	0	0	2	0	0	0	0	0	0	0	0	0	6	2	11	51	8	1	1	0	0
65.6204	0	157.5	132.6	53.4543	2.40858	1	1	0	0	0	0	0	0	0	0	0	0	0	0	0	0	0	0	0	0	0	0	1	0	0	0	0	0	0	0	0	0	1	0	0	0	3	6	55	3	0	0	0	0
68.3528	1	159	73.8	29.1919	1.80541	1	1	1	1	0	0	0	1	0	0	0	0	0	0	1	1	1	0	0	0	0	0	1	0	0	0	0	0	0	0	0	0	0	0	0	0	3	8	69	11	1	1	0	0
61.0702	1	182.9	77.8	23.2569	1.98813	1	0	1	0	0	0	0	1	0	0	0	0	0	0	0	0	1	0	0	0	0	0	0	0	0	0	0	0	0	0	1	0	0	0	0	0	3	4	36	2	0	0	0	0
68.9615	1	190.5	76.6	21.1076	2.01331	0	0	0	0	0	0	1	0	1	0	0	0	0	0	0	0	0	0	0	0	0	0	0	0	0	2	0	0	0	0	0	0	0	0	0	6	3	11	92	7	0	1	1	0
66.2983	0	173.7	63.4	21.0131	1.74901	1	0	0	0	0	0	0	1	0	0	0	1	1	1	0	0	1	0	0	0	0	0	0	0	0	0	0	0	0	0	1	0	0	0	0	0	3	4	76	3	0	1	0	0
66.8925	1	182	85.8	25.9027	2.08271	0	0	0	0	0	0	0	1	0	0	0	0	0	0	0	0	1	0	0	0	0	1	0	1	0	0	0	0	0	1	1	0	0	0	3	0	3	9	68	5	0	1	0	0
62.0883	0	178	124.6	39.3258	2.48209	0	1	0	0	0	0	0	0	0	0	0	0	0	0	0	0	0	0	0	0	0	0	0	0	0	0	0	0	0	0	0	0	0	0	0	0	3	5	92	10	1	0	0	1
67.0032	0	153	54.1	23.1108	1.51633	0	0	1	0	0	0	0	1	0	0	0	0	0	0	0	0	0	0	0	0	1	0	0	0	0	0	0	0	0	0	0	0	0	0	0	0	3	3	110	8	0	0	0	0
79.4996	0	165	82.4	30.2663	1.94336	0	0	1	0	0	0	0	1	0	0	0	0	0	0	0	1	1	1	0	0	0	0	0	0	0	2	0	0	0	0	0	0	0	0	0	0	4	7	67	6	0	1	0	0
72.84	0	168	99	35.0765	2.14942	1	0	0	0	0	0	1	1	0	0	0	1	1	0	0	0	1	0	0	0	1	0	0	0	0	0	0	0	0	0	0	1	0	0	0	0	4	5	87	11	0	1	0	0
79.7483	1	178	53.9	17.0117	1.6325	1	0	1	1	0	0	0	1	0	0	0	0	0	0	0	0	0	0	0	0	0	0	0	1	1	0	0	0	0	0	0	0	0	0	0	0	4	7	127	11	0	1	1	1
79.6369	1	188	99.7	28.2085	2.28179	0	0	1	1	0	0	0	1	0	0	0	0	0	0	0	0	0	0	0	0	0	0	0	0	0	0	0	0	0	0	0	0	0	0	0	0	4	5	87	10	1	1	0	0
71.4047	1	172.5	89.3	30.0105	2.06856	1	0	1	1	1	0	0	1	0	0	0	1	0	1	0	1	1	1	0	0	1	0	1	0	0	0	2	0	0	0	1	0	1	0	0	0	4	10	56	3	0	0	0	0
82.8728	1	175.9	76.3	24.66	1.93083	1	0	1	1	0	0	1	1	1	0	0	1	1	0	0	0	0	0	0	0	0	0	0	0	0	2	0	0	0	0	0	0	0	0	0	0	5	7	41	3	0	0	0	0
82.5103	1	173	89.5	29.9041	2.07388	1	1	1	0	0	0	0	1	0	0	0	0	0	0	0	0	0	0	0	0	1	0	0	1	0	0	0	0	0	0	0	0	0	0	0	0	5	7	103	10	0	1	0	1
87.9372	1	170	81.4	28.1661	1.96058	1	1	1	1	0	0	0	1	0	0	1	0	0	0	0	0	0	0	0	0	0	0	0	0	0	0	0	0	0	0	0	0	0	2	0	0	5	12	62	5	0	1	0	0
51.5018	1	177.8	85.9	27.1725	2.05973	0	0	0	0	0	0	0	0	0	0	0	0	0	0	0	0	0	0	0	0	0	0	0	0	0	0	0	0	0	0	0	0	0	0	0	0	2	2	48	5	0	1	0	0
52.2591	0	170	69.9	24.1869	1.81682	1	0	0	1	0	0	1	1	1	0	0	1	1	1	0	0	0	0	0	0	0	0	0	0	0	0	0	0	0	0	0	0	0	0	0	0	2	3	56	4	0	0	0	0
66.7322	1	180	90.4	27.9012	2.12603	0	0	0	0	0	0	0	0	0	0	0	0	0	0	0	0	0	0	0	0	0	0	0	0	0	0	0	0	0	0	0	0	0	0	0	0	3	3	58	4	0	0	0	0
65.8855	0	161	99.8	38.5016	2.11265	0	1	0	0	0	0	0	0	0	0	0	0	0	0	0	0	0	0	0	0	0	0	0	0	0	0	0	0	0	0	0	0	0	0	0	0	3	4	90	9	1	0	0	0
60.791	1	171.5	83.5	28.3895	1.99445	0	0	0	0	0	0	0	0	0	0	0	1	0	1	0	0	0	0	0	0	0	0	0	0	0	2	0	0	0	0	0	0	0	0	0	0	3	5	75	8	0	0	0	0
79.2246	1	171	75.9	25.9567	1.89875	1	0	0	1	0	0	1	1	0	0	0	1	1	0	1	1	1	1	0	0	0	0	0	0	0	0	0	0	0	0	0	0	0	0	0	0	4	7	52	5	1	0	0	0
75.5458	1	165.6	54.6	19.91	1.5848	1	0	1	0	0	0	1	1	1	0	0	0	0	0	0	1	1	1	0	0	0	0	0	0	0	2	0	0	0	1	0	0	0	0	0	0	4	7	68	7	0	1	0	0
79.4466	1	173	82.1	27.4316	1.98629	0	0	0	0	0	0	0	0	0	0	0	0	0	0	0	0	0	0	0	0	0	0	0	0	0	0	0	0	0	0	0	0	0	0	0	0	4	4	55	4	0	0	0	0
89.0376	0	162	57.4	21.8717	1.60717	0	0	0	0	0	0	0	0	0	0	0	0	0	0	0	0	0	0	0	0	0	0	0	0	0	0	0	0	0	0	0	0	1	0	0	0	5	7	74	1	0	0	0	0
87.0016	1	173	64.1	21.4174	1.7551	0	0	1	1	0	0	0	1	0	0	0	1	1	1	0	1	1	0	0	0	0	0	0	0	0	0	0	0	0	0	0	0	0	0	0	0	5	7	99	4	0	1	0	0
86.4058	0	160	67	26.1719	1.72562	1	0	1	1	0	0	1	1	1	0	0	1	0	1	0	0	0	0	0	0	1	0	1	0	1	0	0	0	0	0	0	0	0	0	0	0	5	9	56	5	0	0	0	0
80.716	1	160	71	27.7344	1.77639	1	0	1	1	0	0	0	0	0	0	0	1	1	1	0	0	0	0	0	0	0	0	1	1	0	2	0	0	0	0	0	0	0	0	0	6	5	17	64	6	0	0	0	1
86.0809	1	160	59.3	23.1641	1.62344	1	0	1	1	0	0	0	1	0	0	0	0	0	0	1	1	1	0	0	0	0	0	1	0	0	0	2	0	0	0	0	0	0	0	0	0	5	11	127	9	0	1	0	1
86.066	1	168	66.5	23.5615	1.76163	1	0	1	1	0	0	1	1	0	0	0	0	0	0	0	1	1	0	0	0	0	0	0	0	0	2	0	2	0	0	0	0	0	0	0	0	5	12	113	7	0	1	0	0
44.0079	0	158	73.9	29.6026	1.80094	0	0	0	1	0	0	0	0	0	0	0	0	0	0	0	0	0	0	0	0	1	0	0	0	0	0	0	0	0	0	0	0	0	0	0	0	1	1	73	5	0	0	0	0
43.2522	0	148	89.9	41.0427	1.92247	0	0	0	0	0	0	0	0	0	0	0	0	0	0	0	0	0	0	0	0	0	0	0	0	0	0	0	0	0	0	0	0	0	0	0	0	1	1	53	10	0	0	0	0
49.4501	0	162.6	57.1	21.5971	1.60593	0	1	0	0	0	0	0	0	0	0	0	0	0	0	0	0	0	0	0	0	0	1	0	0	0	0	0	0	0	0	0	0	0	0	0	0	1	3	62	7	0	1	0	0
62.3041	0	169	75.3	26.3646	1.88014	0	0	0	0	0	0	0	0	0	0	0	0	0	0	0	0	0	0	0	0	0	0	0	0	0	0	0	0	0	0	0	0	0	0	0	0	3	3	45	3	0	0	0	0
62.0224	1	164	75.7	28.1454	1.85703	1	0	1	1	1	0	0	1	0	0	0	0	0	0	0	0	0	1	0	0	0	0	0	0	0	0	0	0	0	1	0	0	1	0	0	0	3	5	59	8	0	1	0	0
61.2185	1	160	81.3	31.7578	1.90088	0	0	0	0	0	0	0	1	0	0	0	1	0	1	0	0	0	0	0	0	0	0	0	0	0	0	0	0	0	0	0	0	0	0	0	0	3	3	63	7	0	1	0	0
66.6455	0	172	37.4	12.642	1.33675	0	0	0	0	0	0	0	1	0	0	0	0	0	0	0	1	1	0	0	0	0	0	0	0	0	2	0	0	0	0	0	0	0	0	0	0	3	7	82	3	0	1	0	0
69.3103	0	163	100.2	37.7131	2.12998	1	0	1	0	0	0	0	0	0	0	0	0	0	0	0	0	0	0	0	0	0	0	0	0	0	0	0	0	0	0	0	0	0	0	0	0	3	3	70	7	1	0	0	1
75.3167	1	168	70	24.8016	1.80739	1	0	0	1	0	0	0	0	0	0	0	0	0	0	0	0	0	0	0	0	0	0	0	0	0	2	0	0	0	0	0	0	0	0	0	0	4	6	45	2	0	1	0	0
70.2618	1	182.9	138.8	41.4918	2.65552	0	1	0	0	0	0	0	1	0	0	0	0	0	0	0	0	0	0	0	0	0	0	0	0	0	0	0	0	0	0	0	0	0	0	0	0	4	6	75	7	0	0	0	0
73.6881	0	165.1	74.8	27.4415	1.85214	0	0	0	0	0	0	0	0	0	0	0	0	0	0	0	0	0	0	0	0	0	0	0	0	0	2	0	0	0	0	0	0	1	0	0	0	4	7	58	1	0	0	0	0
72.5683	1	171	72.1	24.6572	1.85061	0	1	0	0	0	0	0	0	0	0	0	0	0	0	0	0	0	0	0	0	0	0	0	0	0	0	0	0	0	0	0	0	0	0	0	0	4	5	163	15	1	0	0	1
84.9547	0	162.6	61.5	23.2613	1.66666	0	0	0	0	0	0	0	0	0	0	0	0	0	0	0	0	0	0	0	0	0	1	0	0	0	2	0	0	0	1	0	0	0	0	3	0	5	11	86	7	0	0	0	0
81.11	1	178	93.1	29.3839	2.14553	1	0	0	0	0	0	1	0	0	0	0	0	0	0	0	0	0	0	0	0	0	0	0	0	0	0	0	0	0	0	0	0	0	0	0	0	5	5	73	2	0	0	0	0
47.9075	1	179	109.4	34.1438	2.3323	0	0	1	0	0	0	0	1	0	0	0	0	0	0	0	0	0	0	0	0	0	0	0	0	0	0	0	0	0	0	0	0	0	0	0	0	1	2	66	4	1	1	0	0
59.6217	1	165	67.4	24.7567	1.7576	0	0	0	0	0	0	0	0	0	0	0	0	0	0	0	0	0	1	0	0	0	1	0	0	0	0	0	0	0	1	0	0	0	0	0	0	2	3	86	12	0	0	0	0
60.4443	1	168	98.9	35.0411	2.14833	0	0	0	1	0	0	0	0	0	0	0	0	0	0	0	0	0	0	0	0	0	0	0	0	0	2	2	0	0	0	0	0	0	0	0	0	3	8	59	4	1	0	0	0
62.8274	1	193	91.6	24.5913	2.21603	1	0	1	0	0	0	0	0	0	0	0	0	0	0	0	1	1	0	0	0	0	0	0	0	0	2	0	0	0	0	0	0	0	0	0	6	3	12	133	13	1	1	0	0
85.8515	1	189	156.3	43.7558	2.86457	1	0	0	0	0	0	0	0	0	0	0	0	0	0	0	0	0	0	0	0	0	0	0	0	0	0	0	0	0	0	0	0	0	0	0	0	5	5	72	4	0	0	0	0
83.6905	0	163	90.8	34.1752	2.02761	1	0	0	0	0	0	0	0	0	0	0	1	0	1	0	0	0	0	0	0	0	0	0	0	0	0	0	0	0	0	0	0	0	0	0	0	5	5	102	11	0	1	0	1
86.1749	0	170	73	25.2595	1.85667	0	1	1	0	0	0	0	1	0	0	0	1	0	1	0	0	0	0	0	0	1	0	0	0	1	2	0	0	0	0	0	0	0	0	0	0	5	11	62	5	0	1	0	0
82.1755	1	167	87.7	31.4461	2.017	0	0	0	1	0	0	1	0	1	1	0	0	0	0	0	0	0	0	0	0	0	0	0	0	0	2	0	0	0	0	0	0	0	0	0	0	5	8	63	6	0	1	0	1
58.7476	0	156	68.2	28.0243	1.71911	1	0	0	1	0	0	0	0	0	0	0	0	0	0	0	0	1	0	0	0	1	1	1	0	0	0	0	0	0	1	1	0	0	0	0	0	2	6	58	5	0	1	0	0
69.5499	1	171	127.3	43.5348	2.45901	1	1	1	0	0	0	0	0	0	0	0	0	0	0	0	0	0	0	0	0	0	0	0	1	0	0	0	0	0	0	0	0	0	0	0	0	3	7	44	6	0	0	0	0
60.8941	1	155.5	71.1	29.4042	1.75246	0	0	0	0	0	0	0	0	0	0	0	0	0	0	0	0	0	0	0	0	0	0	0	0	0	2	0	0	0	1	0	0	0	0	0	6	3	11	71	7	0	1	0	1
60.9149	1	180	77.3	23.858	1.96596	0	0	0	1	0	0	0	0	0	0	0	0	0	0	0	0	0	1	0	0	0	0	0	0	0	2	0	0	0	0	0	0	0	0	0	0	3	6	153	18	1	0	0	0
66.2525	1	182	88.5	26.7178	2.11522	1	1	1	1	0	0	0	1	0	0	0	1	1	1	1	1	1	1	0	0	0	0	0	0	0	2	0	0	0	1	0	0	0	0	0	0	3	9	67	7	1	1	0	1
62.7391	1	180	107.4	33.1481	2.31733	1	1	1	0	0	0	0	0	0	0	0	1	1	1	1	0	0	0	0	0	0	0	0	0	0	0	0	0	0	0	0	0	0	0	0	0	3	4	69	8	1	0	0	0
78.3199	1	170	98.9	34.2215	2.16108	1	1	1	1	0	0	1	0	0	0	0	0	0	0	0	0	0	0	0	0	0	0	0	0	1	0	0	0	0	0	0	0	0	0	0	0	4	8	65	5	0	1	1	1
72.7156	1	170	115.2	39.8616	2.33238	1	1	1	0	0	0	0	0	0	0	0	0	0	0	1	0	1	0	0	0	0	0	0	0	0	0	0	0	0	0	1	0	0	0	0	0	4	6	54	6	0	0	0	0
86.3706	1	178	77.8	24.555	1.96132	1	0	1	0	0	0	0	0	0	1	0	0	0	0	0	0	0	0	0	0	0	0	0	0	0	2	0	0	0	0	0	0	0	0	0	0	5	8	99	8	0	0	0	0
56.2231	0	160	111.6	43.5937	2.22711	1	0	1	0	0	0	0	1	0	0	0	0	0	0	1	0	0	0	0	0	0	0	0	0	0	0	0	0	0	0	0	0	0	0	0	0	2	3	68	7	0	0	0	0
68.4158	0	162.6	61.7	23.3369	1.66937	1	1	1	1	0	0	0	1	0	0	0	1	1	1	0	0	0	0	0	0	0	0	0	0	0	2	0	0	0	0	0	0	0	0	0	6	3	13	69	5	0	0	0	0
65.943	1	170	58.4	20.2076	1.66066	0	1	0	0	0	0	0	0	0	0	0	0	0	0	0	0	0	0	0	0	0	0	0	0	0	2	0	0	0	0	0	0	0	0	0	0	3	6	96	13	0	1	0	0
78.8654	1	180	122.5	37.8086	2.47487	0	0	0	1	0	0	0	0	0	0	0	0	0	0	1	0	0	0	0	0	1	0	0	0	0	2	0	0	0	0	0	0	0	0	0	0	4	6	66	4	0	1	0	0
79.542	0	162.6	95.1	35.9699	2.07252	0	1	0	0	0	0	0	0	0	0	0	0	0	0	0	0	0	0	0	0	0	0	0	0	0	0	0	0	0	0	0	0	0	0	0	0	4	6	53	5	0	1	0	0
73.0626	1	188	97.1	27.4728	2.25184	1	0	0	0	0	0	0	1	0	0	0	0	0	0	0	0	0	0	0	0	0	0	0	0	0	2	0	0	0	0	0	0	0	0	0	6	4	12	82	5	0	0	0	0
74.9712	1	193	91.6	24.5913	2.21603	0	0	0	0	0	0	0	0	0	0	0	0	0	0	0	0	0	0	0	0	0	1	0	0	0	0	0	0	0	0	0	0	0	0	0	0	4	5	106	10	1	0	0	0
79.4085	1	183	70.4	21.0218	1.89174	0	1	0	0	0	0	0	0	0	0	0	0	0	0	0	0	0	0	0	0	0	0	0	0	1	0	0	0	0	0	0	0	0	0	0	0	4	6	80	8	0	0	0	0
72.6124	1	172.5	75.4	25.3392	1.90077	0	0	0	0	0	0	1	0	0	0	0	0	0	0	0	1	1	0	0	0	0	0	0	0	0	2	0	0	0	0	0	1	1	0	0	0	4	8	67	4	0	0	0	1
89.0347	1	170	80.2	27.7509	1.94608	1	0	1	1	0	0	1	1	1	1	0	0	0	0	0	0	0	0	0	0	0	0	0	1	0	0	0	0	0	0	0	0	0	0	0	0	5	6	62	7	0	0	0	0
83.079	0	159	71.9	28.4403	1.78202	1	0	0	0	0	0	0	1	0	0	0	0	0	0	0	0	0	0	0	0	1	0	0	0	0	0	0	0	0	0	0	0	1	0	0	0	5	6	52	5	0	1	0	0
83.4752	1	175	81.1	26.4816	1.98554	1	0	1	0	0	0	0	1	0	0	0	0	0	0	0	0	0	0	0	0	0	0	0	0	0	0	0	0	0	0	0	0	0	0	0	0	5	5	67	5	0	0	0	0
86.6171	1	171	63.4	21.6819	1.73537	0	0	0	0	0	0	0	0	0	0	0	0	0	0	0	1	1	0	0	0	0	0	0	0	0	2	0	2	0	0	0	0	0	0	0	0	5	10	99	6	0	0	0	0
82.2823	0	157.5	102.2	41.1993	2.11453	1	1	1	1	0	0	1	1	1	0	0	1	0	1	1	0	0	0	0	0	1	0	0	0	0	0	0	0	0	0	0	0	1	0	0	0	5	11	77	10	0	0	0	0
85.0602	1	175	83.9	27.3959	2.01952	1	0	0	1	0	0	1	1	0	1	0	0	0	0	0	0	0	0	0	0	0	0	0	0	0	2	0	2	0	0	0	0	0	0	0	0	5	9	62	1	0	0	0	0
46.7031	1	160	41.1	16.0547	1.35154	0	0	0	0	0	0	0	0	0	0	0	1	1	1	0	0	0	0	0	0	0	0	0	1	0	0	0	0	0	1	0	0	0	0	0	0	1	2	81	10	0	0	0	0
55.3365	1	176	52.1	16.8195	1.59597	0	0	0	0	0	0	0	0	0	0	0	0	0	0	0	1	1	1	0	0	0	0	0	0	0	0	0	0	0	1	0	0	0	0	0	0	2	3	117	12	0	1	0	0
53.1876	1	170	111.4	38.5467	2.29359	0	1	0	0	0	0	0	0	0	0	0	0	0	0	0	0	0	0	0	0	0	1	0	0	0	0	0	0	0	1	0	0	0	0	0	0	2	4	88	11	0	1	0	1
58.7255	0	159	62.3	24.643	1.65879	1	0	0	0	0	0	0	1	0	0	0	0	0	0	0	0	0	0	0	0	0	0	1	0	0	0	0	0	0	0	0	0	1	0	0	0	2	4	92	14	0	1	0	1
62.5887	0	165	87.4	32.1028	2.00146	0	0	0	0	0	0	0	0	0	0	0	0	0	0	0	0	0	0	0	0	0	0	0	0	0	0	0	0	0	0	0	0	0	0	0	0	3	3	78	11	1	0	1	0
63.5467	1	169	98.9	34.6276	2.15472	1	0	0	0	0	0	0	1	0	0	0	0	0	0	0	0	0	1	0	0	0	0	0	0	0	0	0	0	0	0	0	0	0	0	0	0	3	3	97	12	0	1	0	0
73.4113	0	153	64.7	27.6389	1.65824	0	1	0	0	0	0	0	0	0	0	0	0	0	0	0	1	1	0	0	0	0	0	0	0	0	0	0	0	0	0	0	0	0	0	0	0	4	6	126	9	1	1	0	0
77.9158	0	163	101.4	38.1648	2.1427	1	1	0	0	0	0	0	0	0	0	0	0	0	0	0	0	0	0	0	0	0	0	0	0	0	2	0	0	0	0	0	0	0	0	0	0	4	7	82	7	0	0	0	0
75.2444	0	148	70.8	32.3229	1.70607	0	0	0	0	0	0	1	0	0	0	0	1	0	1	0	1	1	0	0	0	0	0	0	0	0	2	0	0	0	0	0	0	0	0	0	6	4	13	89	10	0	1	0	1
71.3326	1	181	96.2	29.3642	2.19925	0	0	0	0	0	0	0	0	0	0	0	0	0	0	0	0	0	0	0	0	0	1	0	0	0	0	0	0	0	0	0	0	0	0	0	0	4	6	132	13	1	0	0	1
86.0203	1	166	60.6	21.9916	1.67163	1	0	1	0	0	0	0	0	1	1	0	1	0	1	0	0	0	0	0	0	0	0	0	1	0	2	0	0	0	0	0	0	0	0	0	0	5	9	108	10	0	1	0	0
86.4718	0	167.5	91	32.4348	2.05768	1	0	1	0	0	0	1	1	0	0	0	1	1	1	0	0	0	0	0	0	0	0	0	0	0	0	0	0	0	0	0	0	1	0	0	0	5	6	74	9	0	0	0	0
61.933	1	177	86.3	27.5464	2.05987	1	0	1	1	1	0	0	1	0	0	1	0	0	0	0	1	1	0	0	0	0	0	0	1	0	0	0	0	0	1	1	0	0	0	0	0	3	6	65	3	1	0	1	0
75.7581	1	167	90.4	32.4142	2.04782	0	0	0	0	0	0	0	0	0	0	0	0	0	0	0	1	1	0	0	0	0	0	0	0	0	0	0	0	0	0	0	0	0	0	0	0	4	5	83	10	0	0	0	0
73.9357	1	177.7	97.8	30.9716	2.19716	1	1	0	0	0	0	0	1	0	0	0	1	0	1	0	0	0	0	0	0	0	0	0	0	0	2	0	0	0	0	0	0	0	0	0	0	4	9	72	11	0	0	0	0
82.2195	1	179	96.2	30.024	2.18707	1	1	0	1	0	0	0	1	0	0	0	0	0	0	0	0	0	0	0	0	0	0	0	0	0	2	0	0	0	0	0	0	0	0	0	6	5	14	69	9	1	0	0	0
87.444	1	172.7	63.5	21.2907	1.74535	1	0	1	1	1	0	0	1	0	0	0	0	0	0	0	1	1	0	0	0	0	0	0	0	0	0	0	2	0	0	0	0	1	0	0	0	5	12	94	8	0	0	0	0
85.5942	1	180.3	73.94	22.7451	1.92436	1	1	1	1	0	0	0	1	0	0	0	1	0	1	0	0	0	0	0	0	0	0	0	0	0	2	0	0	0	0	0	0	0	0	0	6	5	14	71	8	0	0	0	0
83.3862	0	160	83.1	32.4609	1.9218	0	0	1	1	0	0	0	0	0	0	0	0	0	0	0	0	0	0	0	0	0	0	0	1	1	2	0	0	0	0	0	0	0	0	0	0	5	10	68	3	0	0	0	0
80.1735	1	167	86.4	30.98	2.002	1	1	1	1	0	0	0	1	0	0	0	0	0	0	1	0	0	0	0	0	0	0	0	0	0	0	0	0	0	0	0	0	0	0	0	0	5	6	61	3	0	1	0	0
80.6508	0	170	115.5	39.9654	2.33542	0	0	0	0	0	0	0	0	0	0	0	0	0	0	0	0	0	0	0	0	0	0	0	0	0	2	0	0	0	0	0	0	0	0	0	0	5	7	124	10	0	0	0	0
90.0993	1	162	77.4	29.4925	1.86628	1	0	0	0	0	0	1	0	0	0	0	1	1	0	1	1	1	0	0	0	0	0	0	0	0	2	0	0	0	0	1	0	0	0	0	0	6	11	57	6	0	0	0	0
91.0931	0	150	71.6	31.8222	1.72723	1	0	0	0	1	0	0	0	0	0	0	0	0	0	0	0	0	0	0	0	1	0	1	1	1	0	0	0	0	0	0	0	0	0	0	0	6	10	161	16	1	0	0	0
44.2454	0	161	58.2	22.4528	1.61333	0	0	0	0	0	0	0	0	0	0	0	0	0	0	0	0	0	0	0	0	0	0	0	0	0	0	0	0	0	0	0	0	0	0	0	0	1	1	43	10	1	0	0	0
48.5794	0	162	172	65.5388	2.78209	1	0	0	0	0	0	0	0	0	0	0	0	0	0	1	0	1	1	0	0	0	0	1	0	0	2	0	0	0	1	1	0	0	0	0	0	1	5	69	8	1	0	0	0
58.6602	1	178	129.1	40.7461	2.52651	0	0	0	0	0	0	0	0	0	0	0	0	0	0	0	0	0	0	0	0	0	0	0	0	0	0	0	0	0	0	0	0	0	2	0	0	2	4	49	6	0	1	0	0
55.1885	1	181	92.6	28.2653	2.15771	0	0	0	0	0	0	0	0	0	0	0	0	0	0	0	0	0	0	0	0	0	0	0	0	0	2	0	0	0	0	0	0	0	0	0	0	2	4	70	10	0	0	0	0
56.5389	1	182	110	33.2085	2.3582	0	1	0	0	0	0	0	0	0	0	0	0	0	0	0	0	0	0	0	0	0	0	0	0	0	0	0	0	0	0	0	0	0	0	0	0	2	3	113	11	1	0	0	0
53.3599	1	175	118.2	38.5959	2.39705	0	1	1	0	0	0	0	1	0	0	0	1	1	1	1	0	0	0	0	0	1	1	0	0	0	2	0	0	0	0	0	0	0	0	3	0	2	9	66	4	0	0	0	0
61.2155	1	172	89.5	30.2528	2.06788	1	1	0	0	0	0	0	0	0	0	0	0	0	0	0	0	0	0	0	0	0	0	0	0	0	0	0	0	0	0	0	0	0	0	0	0	3	4	56	5	0	0	0	0
68.3275	1	177	87	27.7698	2.06821	1	0	1	1	1	0	1	1	0	0	0	0	0	0	1	1	1	0	0	0	0	0	0	1	0	0	0	0	0	0	0	0	0	0	0	0	3	8	83	12	1	1	0	0
79.7477	1	190.5	121.3	33.425	2.53353	1	1	0	1	0	0	1	1	0	0	0	1	1	1	0	0	0	0	0	0	0	0	0	0	0	0	0	0	0	0	0	0	0	0	0	0	4	6	61	8	0	0	0	0
78.2967	0	154.9	88.9	37.0509	1.9558	0	1	1	0	0	0	1	1	1	0	1	0	0	0	0	0	0	0	0	0	0	0	0	1	0	0	0	0	0	0	0	0	1	0	0	0	4	8	77	10	0	1	0	1
71.1868	1	182	94.5	28.5292	2.18575	1	1	1	1	0	0	1	1	0	0	0	1	1	0	0	1	1	0	0	0	0	0	0	0	0	0	0	0	0	0	0	0	0	0	0	0	4	7	84	6	1	1	0	0
75.3645	1	194	110.8	29.4399	2.44354	0	1	0	0	0	0	0	0	0	0	0	0	0	0	0	1	1	0	0	0	0	1	1	0	0	0	0	0	0	1	0	1	0	0	3	0	4	11	101	7	0	1	0	0
74.1538	1	177	97.1	30.9936	2.18497	1	0	1	0	0	0	0	0	0	0	0	1	0	1	0	0	0	0	0	0	0	0	0	0	0	2	0	0	0	0	0	0	0	0	0	0	4	6	102	4	1	1	0	0
82.5811	0	161	0	0	0	1	1	0	0	0	0	1	1	0	0	0	0	0	0	0	0	0	0	0	0	0	0	0	0	0	0	0	0	0	0	0	0	1	0	0	0	5	7	86	5	0	0	0	0
87.8507	1	170	87.5	30.2768	2.03272	1	1	1	1	0	0	0	1	0	0	0	0	0	0	0	0	0	0	0	0	0	0	0	0	0	2	0	0	0	0	0	0	0	0	0	0	5	9	84	7	1	1	0	0
87.0907	1	180	121.9	37.6235	2.46881	1	0	0	0	0	0	0	1	0	0	0	1	0	1	0	0	0	0	0	0	0	0	0	1	0	0	0	0	0	0	0	0	0	0	0	0	5	6	121	13	0	1	0	1
82.0744	0	155	95	39.5421	2.02244	0	1	0	0	0	0	0	0	0	0	0	0	0	0	0	0	0	0	0	0	0	0	0	0	0	2	0	0	0	0	0	0	0	0	0	0	5	10	82	9	1	0	1	1
82.2339	0	158	72.3	28.9617	1.78134	0	0	0	0	0	0	0	0	0	0	0	0	0	0	0	0	0	0	0	0	0	0	0	0	1	0	0	0	0	0	0	0	0	0	0	0	5	6	134	10	0	1	1	1
92.0001	1	184	87.3	25.7857	2.11234	1	0	0	1	0	0	0	0	0	0	0	1	0	1	0	0	0	0	0	0	0	0	0	0	1	0	0	0	0	0	0	0	0	0	0	0	6	8	109	7	0	1	1	0
38.9591	0	164	70.8	26.3236	1.79592	0	0	0	0	0	0	0	0	0	0	0	0	0	0	0	0	0	1	0	0	0	0	0	0	0	0	0	0	0	0	0	0	0	0	0	0	0	0	51	9	1	0	0	0
61.1741	1	154	61.3	25.8475	1.61934	0	0	0	0	0	0	0	0	0	0	0	0	0	0	0	0	0	0	0	0	0	0	0	0	0	0	0	0	0	0	0	0	0	0	0	0	3	3	88	9	0	1	1	1
67.4074	1	177	65.2	20.8114	1.79044	0	1	0	0	1	0	0	1	0	0	0	0	0	0	0	0	0	0	0	0	0	0	0	0	0	0	0	0	0	0	0	0	0	0	0	0	3	5	88	6	0	0	0	0
62.2088	1	176	200	64.5661	3.12694	1	1	1	1	0	0	1	0	1	1	1	0	0	0	1	0	0	0	0	0	0	0	1	0	0	0	0	0	0	0	0	0	0	0	0	0	3	7	88	9	0	0	0	1
63.7449	0	162	66.5	25.3391	1.72988	1	1	1	0	1	0	0	1	0	0	0	0	0	0	0	0	0	0	0	0	0	0	0	0	0	0	0	0	0	0	0	0	0	0	0	0	3	7	69	3	0	1	0	0
62.6713	0	159	99	39.1598	2.09105	0	0	1	0	0	0	0	1	0	0	0	0	0	0	1	1	1	0	0	0	1	0	1	0	0	0	0	0	0	0	1	0	1	0	0	0	3	6	97	11	0	1	0	0
72.5648	1	182	103.1	31.1255	2.28304	0	1	1	1	1	0	0	0	0	0	0	1	0	1	1	0	0	1	0	0	0	1	0	0	0	2	0	0	0	0	0	0	0	0	3	0	4	14	84	9	0	0	0	0
80.61	1	175	129.1	42.1551	2.50513	1	0	1	0	0	0	0	0	0	0	0	1	1	1	0	0	0	0	0	0	0	0	0	0	0	0	0	0	0	0	0	0	0	0	0	0	5	6	83	5	0	0	0	0
84.3219	1	192	88.8	24.0885	2.17624	0	0	0	1	0	0	1	1	0	0	0	0	0	0	1	0	0	0	0	0	0	0	0	0	0	2	0	0	0	0	0	0	0	0	0	0	5	8	141	15	1	0	0	1
89.8622	1	160	73.7	28.7891	1.80985	1	0	0	0	0	0	0	1	0	0	0	0	0	0	0	0	0	0	0	0	0	0	0	0	0	0	0	0	0	0	0	0	0	0	0	0	5	5	69	4	0	1	0	0
80.1657	1	171.2	69.4	23.6784	1.81669	1	0	1	0	0	0	0	0	0	0	0	0	0	0	0	0	0	0	0	0	0	0	0	0	0	2	0	2	0	0	0	0	0	0	0	0	5	9	137	16	1	1	0	0
94.056	1	180	85.4	26.358	2.0664	1	1	0	1	0	0	1	1	0	0	0	0	0	0	0	0	0	0	0	0	0	0	0	0	0	2	0	0	0	0	0	0	0	0	0	0	6	10	87	3	0	0	0	0
91.8349	1	172.7	82.4	27.6276	1.98819	0	0	0	0	0	0	0	1	0	0	0	0	0	0	0	0	0	0	0	0	0	1	0	0	0	0	0	0	0	0	0	0	0	0	0	0	6	7	78	5	0	0	0	0
90.1532	1	174	84.2	27.8108	2.01734	1	1	1	1	0	0	0	1	0	0	0	0	0	0	0	1	1	0	0	0	0	0	0	0	1	2	0	0	0	0	1	0	0	0	0	0	6	12	65	2	0	0	0	0
50.836	1	162	167.9	63.9765	2.74873	1	1	1	0	0	0	0	0	0	0	0	0	0	0	1	0	0	1	0	0	0	0	0	0	0	2	0	0	0	0	0	0	0	0	0	0	2	5	48	8	0	0	0	0
56.0703	1	181	78.8	24.053	1.99045	0	0	0	0	0	0	0	0	0	0	0	0	0	0	0	1	1	1	0	0	0	0	0	0	0	0	2	2	0	1	0	0	0	0	0	0	2	7	115	12	1	0	0	1
70.1053	0	170	73	25.2595	1.85667	1	0	1	1	0	0	1	1	1	1	0	0	0	0	0	0	1	0	0	0	1	0	0	0	0	2	0	0	0	0	1	0	0	0	0	0	4	8	101	4	0	0	0	0
72.8609	0	163	90.5	34.0623	2.02426	0	1	0	0	0	0	0	0	0	0	0	0	0	0	0	0	0	0	0	0	0	0	0	1	0	0	0	0	0	0	0	0	0	0	0	0	4	6	79	7	0	0	0	0
81.8228	1	182.9	69.1	20.6562	1.87368	1	0	0	1	0	0	1	1	0	0	0	1	0	1	0	0	0	0	0	0	0	0	0	0	1	2	0	0	0	1	0	0	0	0	0	0	5	8	65	6	0	1	0	0
86.7572	0	157	76.7	31.1169	1.82893	1	0	0	0	0	0	0	0	0	0	0	0	0	0	0	0	0	0	0	0	0	0	0	0	0	0	0	0	0	0	0	0	1	0	0	0	5	6	64	9	0	0	0	1
84.1332	0	159	78.2	30.9323	1.85845	0	0	0	0	0	0	0	0	0	0	0	0	0	0	0	0	0	0	0	0	0	0	0	0	0	0	0	0	0	0	0	0	0	0	0	0	5	5	77	3	0	0	0	0
88.225	1	165	72.7	26.7034	1.8254	0	0	1	1	0	0	1	1	0	0	0	1	0	1	0	1	1	0	0	0	0	0	0	1	1	2	0	0	0	0	1	0	0	0	0	0	5	12	81	9	1	0	0	1
82.9484	0	162	71.1	27.0919	1.78871	1	0	1	0	0	0	0	0	0	0	0	1	1	1	0	0	0	0	0	0	0	0	0	0	0	0	0	2	0	0	0	0	1	0	0	0	5	8	118	15	1	1	0	0
106.527	1	160	69.9	27.3047	1.76257	1	1	0	0	0	0	0	1	1	0	0	1	0	1	1	0	0	0	0	0	1	0	1	1	0	0	0	0	0	0	0	0	0	0	0	0	7	11	123	15	1	0	0	0
47.1781	0	145	60.1	28.585	1.55586	0	0	0	0	0	0	0	0	0	0	0	0	0	0	0	0	0	0	0	0	0	0	0	0	0	0	0	0	0	0	0	0	1	2	0	0	1	4	112	9	1	1	1	0
58.9321	1	79.2	178	283.772	1.97889	0	1	0	0	0	0	0	1	0	0	0	0	0	0	0	1	1	1	0	0	0	0	0	0	0	0	0	0	0	0	0	0	0	0	0	0	2	4	77	11	0	1	0	0
51.9087	1	181	106.3	32.4471	2.31182	0	0	0	1	0	0	1	0	0	0	0	0	0	0	0	0	0	1	0	0	0	1	0	0	0	0	0	0	0	1	0	0	0	0	0	0	2	3	111	14	0	1	1	0
88.1251	1	168	59.4	21.0459	1.66493	0	0	0	1	0	0	0	1	1	1	0	0	0	0	0	0	0	0	0	0	0	0	0	0	0	2	2	0	0	0	0	0	0	0	0	0	5	9	87	10	0	0	0	0
80.7307	1	185	84.1	24.5727	2.0789	0	0	0	0	0	0	0	0	0	0	0	0	0	0	0	0	0	0	0	0	0	0	0	0	0	2	0	0	0	0	0	0	0	0	0	0	5	7	74	2	1	0	1	1
85.8746	0	158	65	26.0375	1.68902	1	0	0	0	0	0	0	1	0	0	0	0	0	0	0	1	1	0	0	0	1	0	0	0	0	0	0	0	0	0	1	0	0	0	0	0	5	7	84	3	0	0	0	0
85.0334	0	152	67.5	29.2157	1.68819	0	0	0	0	1	0	0	0	0	0	0	0	0	0	0	0	0	0	0	0	0	0	0	1	0	2	0	0	0	0	0	0	0	0	0	0	5	9	118	13	0	0	0	1
88.2811	0	170	44.4	15.3633	1.44799	1	1	1	1	0	0	0	0	0	1	0	0	0	0	0	0	0	0	0	0	0	0	0	0	0	0	0	0	0	0	0	0	0	0	0	0	5	7	95	5	0	0	0	0
65.3778	0	158.5	101.1	40.2432	2.10979	1	0	1	0	0	0	1	1	0	0	0	0	0	0	0	0	0	0	0	0	0	0	0	0	0	2	0	0	0	0	0	0	0	0	0	0	3	5	129	19	1	0	0	0
78.5702	0	147.3	129.6	59.731	2.30278	1	0	1	0	0	0	0	0	0	0	0	1	0	1	0	1	1	0	0	0	0	0	1	0	0	0	0	0	0	0	0	0	0	0	0	0	4	7	78	4	0	0	0	0
77.777	0	150	100.5	44.6667	2.04634	1	1	0	1	0	0	0	0	0	0	0	0	0	0	0	1	1	0	0	0	0	0	0	0	0	0	0	0	0	0	1	0	0	0	0	0	4	7	67	3	0	1	0	0
81.4032	0	150	53.2	23.6444	1.48885	1	0	1	0	0	0	1	0	1	0	0	0	0	0	0	1	1	0	0	0	0	0	0	0	0	2	0	0	0	0	1	0	0	0	0	0	5	8	70	2	0	0	0	0
87.9448	0	162	75.4	28.7304	1.84201	0	0	0	0	0	0	0	0	0	0	0	0	0	0	0	0	0	0	0	0	0	0	0	0	0	0	0	0	0	0	0	0	0	0	0	0	5	5	131	10	1	1	0	0
57.8256	1	172	75.3	25.4529	1.89675	0	0	0	0	0	0	1	1	0	1	0	0	0	0	0	0	0	1	0	0	0	0	0	0	0	0	0	2	0	0	0	0	0	0	0	0	2	4	110	7	0	1	0	0
59.2951	0	162.5	58.5	22.1538	1.625	0	0	1	0	0	0	0	1	0	0	0	0	0	0	0	0	0	0	0	0	0	1	0	0	0	0	0	2	0	0	0	0	0	0	0	0	2	5	180	20	0	1	0	0
51.517	0	165	48.3	17.741	1.48787	0	0	0	0	0	0	0	0	0	0	0	0	0	0	0	0	0	0	0	0	0	0	0	0	0	0	0	0	0	1	0	0	0	0	0	0	2	2	153	19	1	0	0	1
70.4196	1	158	92	36.8531	2.00942	0	1	0	0	0	0	0	0	0	0	0	0	0	0	0	0	0	0	0	0	0	0	0	0	0	0	0	0	0	0	0	0	0	0	0	0	4	7	104	9	0	1	1	1
82.7311	1	167	89.8	32.1991	2.04101	0	0	0	0	0	0	0	0	0	0	0	0	0	0	0	0	0	0	0	0	0	0	0	0	0	2	0	0	0	0	0	0	0	0	0	0	5	7	66	3	0	0	0	0
84.0685	0	165	76.3	28.0257	1.87005	1	0	0	1	0	0	1	0	0	1	0	0	0	0	0	0	0	0	0	0	0	0	0	1	0	0	0	0	0	0	0	0	0	0	0	0	5	6	69	3	0	0	0	0
86.4934	0	152.4	53.5	23.0348	1.50494	0	1	0	0	0	0	0	0	0	0	0	0	0	0	0	1	1	0	0	0	0	0	0	1	0	0	0	0	0	0	0	0	0	0	0	0	5	9	107	8	0	1	0	0
91.854	0	168	84.8	30.0454	1.9893	1	1	0	1	0	0	1	0	0	0	0	0	0	0	0	0	0	0	0	0	0	0	0	1	0	2	0	0	0	0	0	0	0	0	0	6	6	17	128	13	0	1	0	0
67.8186	0	168.5	94.8	33.3894	2.10646	1	1	1	0	0	0	0	0	0	0	0	0	0	0	1	1	1	1	0	0	1	0	0	0	1	2	0	0	0	1	0	0	0	0	0	0	3	8	75	6	1	0	1	0
64.4093	1	182	89.8	27.1103	2.1307	0	1	0	0	0	0	0	0	0	0	0	0	0	0	0	0	0	0	0	0	0	1	0	1	0	0	0	0	0	0	0	0	0	0	0	0	3	6	148	12	0	0	0	0
75.0211	0	157	52.9	21.4613	1.51889	1	1	0	0	0	0	0	0	0	0	1	1	0	1	0	0	0	0	0	0	1	1	1	0	0	0	0	0	0	0	0	0	0	0	3	0	4	12	157	14	0	0	0	0
72.889	1	172.7	65.6	21.9948	1.77397	1	1	1	0	0	0	0	1	0	0	0	1	0	1	0	0	0	1	0	0	0	0	0	0	0	2	0	0	0	0	0	0	0	0	0	6	4	13	89	7	0	0	1	0
82.4473	1	185	85	24.8356	2.08999	1	1	1	0	1	0	1	1	0	0	0	1	1	1	0	1	1	0	0	0	0	0	0	0	0	2	0	0	0	0	0	0	0	0	0	0	5	10	84	5	0	0	0	0
85.2142	1	180	92.8	28.642	2.15407	1	0	1	0	1	0	0	0	0	0	0	0	0	0	0	1	1	0	0	0	0	0	1	0	0	2	0	0	0	0	0	0	0	0	0	0	5	10	84	8	0	0	0	1
81.7406	1	178	75.5	23.8291	1.93211	1	0	1	1	0	0	1	1	0	0	0	0	0	0	0	0	0	0	0	0	0	0	0	1	1	0	0	0	0	0	0	0	0	0	0	0	5	7	99	9	0	0	0	0
58.4419	0	174	95.4	31.5101	2.14732	0	0	0	0	0	0	0	0	0	0	0	0	0	0	0	0	0	0	0	0	0	0	0	0	0	0	0	0	0	0	0	0	0	0	0	0	2	2	102	12	0	0	0	0
66.7639	0	177	124.6	39.7715	2.47511	0	1	0	0	0	0	0	0	0	0	0	0	0	0	0	1	1	0	0	0	0	0	0	0	0	0	0	0	0	0	0	0	0	0	0	0	3	5	63	10	1	0	0	0
77.6924	1	179.5	69.8	21.6634	1.86556	0	0	1	1	0	0	1	1	1	0	1	0	0	0	0	0	1	0	0	0	0	0	0	0	0	0	0	0	0	0	1	0	0	0	0	0	4	7	87	5	0	1	0	0
88.5572	1	183	73	21.7982	1.92635	1	0	0	0	0	0	1	1	1	0	0	0	0	0	0	0	0	1	0	0	1	0	0	0	1	0	0	0	0	0	0	0	0	0	0	0	5	7	112	10	0	1	0	0
83.8485	1	172.5	75.5	25.3728	1.90203	1	0	1	1	0	0	1	1	0	0	0	1	1	1	0	0	0	0	0	0	0	0	0	0	0	2	0	0	0	0	0	0	1	0	0	0	5	10	115	12	0	1	0	1
43.4621	1	182	121.9	36.8011	2.48248	0	0	0	0	0	0	1	1	0	0	0	1	0	1	0	0	0	0	0	0	0	0	0	0	0	0	0	0	0	1	0	0	0	0	0	0	1	2	80	11	1	1	0	0
58.8801	1	173	59.1	19.7467	1.68525	0	0	0	0	0	0	0	0	0	0	0	0	0	0	0	1	1	0	0	0	0	0	0	0	0	0	0	0	0	1	0	0	0	0	0	0	2	3	128	13	0	1	0	0
52.1278	1	180	80.2	24.7531	2.0025	0	0	0	0	0	0	0	0	0	0	0	0	0	0	0	0	0	1	0	0	0	0	0	0	0	2	0	0	0	1	0	0	0	0	0	0	2	4	80	7	1	0	0	1
75.5496	0	180	56	17.284	1.67332	1	1	0	0	0	0	0	0	0	0	0	0	0	0	0	0	0	0	0	0	0	0	0	0	0	2	0	0	0	0	0	0	0	0	0	0	4	7	79	7	0	0	0	0
83.4143	0	154.9	54.9	22.8807	1.53695	1	0	1	0	0	0	1	0	1	0	0	0	0	0	0	0	0	0	0	0	1	0	0	0	1	0	0	0	0	0	0	0	0	0	0	0	5	6	125	10	0	0	0	1
75.1018	1	172	84.5	28.5627	2.00928	0	0	0	0	0	0	0	0	0	0	0	0	0	0	0	1	1	0	0	0	0	0	0	0	0	2	0	0	0	0	0	0	0	0	0	6	4	13	76	8	0	0	0	1
87.8472	1	167.6	92.8	33.037	2.07855	0	0	0	0	0	0	0	0	0	0	0	0	0	0	0	0	0	0	0	0	0	0	0	0	0	0	0	0	0	0	0	0	0	0	0	0	5	6	150	15	1	0	0	1
57.5513	1	167	71.5	25.6373	1.82121	1	0	0	0	0	0	1	1	0	0	0	0	0	0	0	0	0	0	0	0	0	0	0	0	0	0	0	0	0	0	0	0	0	0	0	0	2	2	99	10	1	1	1	0
70.3376	0	155	120.1	49.9896	2.27398	1	1	1	0	0	0	1	1	0	0	0	1	0	1	1	0	0	0	0	0	0	1	0	0	0	2	0	0	0	0	0	0	0	0	0	0	4	8	122	11	1	0	0	0
46.2086	0	180	85.7	26.4506	2.07002	0	0	0	0	0	0	0	0	0	0	0	0	0	0	0	0	0	0	0	0	0	0	0	0	0	0	0	0	0	1	0	0	0	0	0	0	1	1	65	10	0	0	0	0
51.8899	1	167	103.7	37.1831	2.19329	1	1	0	1	0	0	0	0	0	0	0	0	0	0	1	0	0	0	0	0	0	0	0	0	0	0	0	0	0	0	0	0	0	0	0	0	2	5	51	3	0	0	0	0
73.5787	1	180.3	124.4	38.2674	2.49607	1	1	1	1	1	0	1	1	1	0	1	1	1	0	1	1	1	0	0	0	0	0	0	0	0	0	0	0	0	1	0	0	0	0	0	0	4	8	68	10	0	1	0	0
82.2502	0	147	79.7	36.8828	1.804	1	0	0	1	0	0	0	1	0	0	0	1	0	1	0	1	1	0	0	0	0	0	0	0	0	2	2	0	0	0	1	0	0	0	0	6	5	16	107	13	0	1	0	0
89.0509	1	160	46.5	18.1641	1.43759	1	0	0	0	0	0	1	1	0	0	0	1	0	1	0	0	0	0	0	0	0	0	0	0	1	2	0	0	0	0	0	0	1	0	0	0	5	9	90	8	0	0	0	0
74.6492	1	113	80.2	62.8084	1.58663	1	0	1	1	1	0	0	1	0	0	0	0	0	0	0	1	1	1	0	0	0	0	0	1	0	0	0	0	0	0	0	0	0	0	0	0	4	7	195	15	0	0	0	1
72.5031	0	157.5	54.7	22.0509	1.54697	0	0	0	0	0	0	0	0	0	0	0	0	0	0	0	0	0	0	0	0	0	0	0	0	0	0	2	0	0	0	0	0	0	0	0	0	4	6	111	13	1	1	0	0
73.451	0	165	65.3	23.9853	1.73	1	0	1	0	0	0	0	0	0	0	0	1	0	1	0	0	0	0	0	0	0	0	0	0	0	0	0	0	0	0	0	0	1	0	0	0	4	5	177	15	1	0	0	0
56.8095	0	165	107	39.3021	2.21454	0	0	0	0	0	0	0	0	0	0	0	0	0	0	0	0	0	0	0	0	0	0	0	0	0	2	0	0	0	0	0	0	0	0	0	0	2	4	69	11	0	0	0	0
68.4865	0	164	74.1	27.5506	1.8373	1	0	1	1	0	0	0	0	0	0	0	0	0	0	1	0	0	0	0	0	0	1	0	0	0	0	0	0	0	0	0	0	0	0	0	0	3	4	134	15	1	0	0	0
73.0391	1	176	73.6	23.7603	1.8969	0	0	0	0	0	0	1	1	0	0	0	1	0	1	0	0	0	0	0	0	0	0	0	0	0	0	0	0	0	0	0	0	0	0	0	0	4	4	102	8	0	0	0	0
75.1207	0	157	58.2	23.6115	1.59316	0	1	1	0	1	0	0	0	0	0	0	0	0	0	1	1	1	1	0	0	0	0	1	1	1	0	0	0	0	0	0	0	0	0	0	0	4	12	84	4	0	0	0	0
51.4331	1	172	85.6	28.9346	2.02232	1	0	1	1	0	0	0	1	0	0	0	0	0	0	0	0	0	0	0	0	0	0	0	0	0	0	0	0	0	1	0	0	0	0	0	0	2	3	60	5	0	1	0	0
69.492	0	166	106.2	38.5397	2.21292	1	1	0	1	0	0	1	0	0	0	0	0	0	0	1	0	0	0	0	0	0	0	0	0	0	0	0	0	0	0	0	0	1	0	0	0	3	6	76	5	0	0	0	0
66.2086	0	168	82.7	29.3013	1.96452	0	0	0	0	0	0	0	0	0	0	0	0	0	0	0	0	0	0	0	0	0	0	0	0	0	0	0	0	0	0	0	0	0	0	0	0	3	3	72	9	0	0	0	0
68.3227	1	174	152.4	50.3369	2.71404	0	0	0	0	0	0	0	0	0	0	0	0	0	0	0	1	1	0	0	0	0	0	0	0	0	0	0	0	0	0	0	0	0	0	0	0	3	4	99	9	1	1	0	0
79.1058	0	158	68.4	27.3995	1.73263	1	1	1	0	0	0	0	0	0	0	0	0	0	0	0	0	0	0	0	0	1	0	0	1	0	0	0	0	0	0	0	0	0	0	0	0	4	6	110	8	0	0	0	0
80.4128	0	148	65	29.6749	1.63469	0	0	0	1	0	0	1	0	0	0	0	0	0	0	0	0	0	0	0	0	0	0	0	0	0	0	0	0	0	0	0	0	0	0	0	0	5	5	64	7	1	1	0	0
70.9809	1	177.8	93	29.4184	2.14317	1	0	0	0	0	0	1	0	0	0	0	0	0	0	0	0	0	1	0	0	1	1	1	0	0	0	0	0	0	0	0	0	0	0	3	0	4	9	141	16	1	0	0	1
74.9553	1	180	96.5	29.784	2.19659	0	1	0	0	0	0	0	0	0	0	0	0	0	0	0	0	0	0	0	0	0	0	0	0	0	0	0	0	0	0	0	0	0	0	0	0	4	5	134	19	0	0	0	0
53.4233	0	168	72.9	25.8291	1.84445	0	0	0	0	0	0	0	1	0	0	0	0	0	0	0	0	0	0	0	0	0	0	0	0	0	0	0	0	0	0	0	0	1	0	0	0	2	3	57	9	0	1	0	0
72.6101	1	180	90.3	27.8704	2.12485	1	1	0	1	0	0	0	1	0	0	0	0	0	0	1	0	0	0	0	0	0	0	0	0	0	0	0	0	0	0	0	0	0	0	0	0	4	8	86	4	0	0	0	0
55.6307	1	184	108.3	31.9884	2.35273	1	0	0	0	0	0	0	1	0	0	0	0	0	0	1	0	0	0	0	0	1	0	0	0	0	0	0	2	0	0	0	0	0	0	0	0	2	4	60	7	0	1	0	0
56.0487	1	182	126.9	38.3106	2.53288	1	1	1	0	0	0	0	0	0	0	0	0	0	0	0	0	0	0	0	0	0	0	0	0	0	0	0	0	0	0	0	0	0	0	0	0	2	5	57	8	0	0	0	0
62.1979	0	170	106.9	36.9896	2.24679	1	1	1	0	0	0	0	1	0	0	0	0	0	0	0	0	1	0	0	0	1	0	0	0	0	0	0	0	0	1	1	0	0	0	0	0	3	5	107	12	1	1	1	0
71.9684	0	160	88.5	34.5703	1.98326	1	0	1	0	0	0	0	1	0	0	0	0	0	0	1	0	0	0	0	0	0	0	0	1	0	2	0	0	0	0	0	0	0	0	0	0	4	7	64	6	0	1	0	0
66.0628	1	178	108.5	34.2444	2.31619	1	0	1	1	0	0	0	0	0	0	0	0	0	0	0	0	0	1	0	0	0	0	0	0	0	0	0	2	0	0	0	0	0	0	0	0	3	5	102	13	0	0	0	0
78.6581	1	178	71.5	22.5666	1.88023	1	0	1	0	0	0	0	0	0	0	0	0	0	0	1	0	0	0	0	0	0	0	0	0	1	0	0	0	0	0	0	0	0	0	0	0	4	5	96	10	0	0	0	0
55.8555	1	167.6	80.5	28.6581	1.9359	1	0	0	0	0	0	0	0	0	0	0	1	0	1	0	0	1	0	0	0	0	0	0	0	0	0	0	0	0	0	1	0	0	0	0	0	2	3	78	12	0	1	0	1
79.9246	0	169	72.6	25.4193	1.84612	1	0	1	1	0	0	1	1	1	0	0	0	0	0	0	0	0	1	0	0	0	0	0	0	0	0	0	0	0	1	0	0	0	0	0	0	4	5	108	10	0	0	0	0
41.9018	1	162	69.3	26.406	1.76593	0	1	1	0	0	1	0	0	1	0	0	0	0	0	0	0	0	0	0	0	1	0	0	0	0	0	0	0	0	0	0	0	0	0	0	0	1	2	108	14	1	1	0	1
59.3716	0	185	152.6	44.5873	2.80035	1	1	0	0	0	0	1	0	0	0	0	0	0	0	0	0	0	0	0	0	1	0	0	0	0	2	0	0	0	0	0	0	0	0	0	0	2	5	148	18	0	0	0	0
62.2829	1	177.8	203	64.2144	3.16638	0	1	0	0	0	0	0	0	0	0	0	0	0	0	0	0	0	0	0	0	0	0	0	0	0	0	0	0	0	0	0	0	0	0	0	0	3	5	98	10	0	1	1	0
66.7732	0	155	54.3	22.6015	1.52902	0	0	0	0	0	0	0	0	0	0	0	0	0	0	0	0	0	0	0	0	0	0	0	0	0	0	0	0	0	0	0	0	0	0	0	0	3	3	116	11	0	1	0	0
63.0052	1	172.7	114.2	38.2897	2.3406	0	0	0	0	0	0	0	1	0	0	0	0	0	0	0	0	0	1	0	0	0	1	0	0	0	0	0	0	0	0	0	0	0	0	3	0	3	7	158	17	1	0	0	0
71.8939	1	163	88.1	33.1589	1.99724	1	0	1	1	0	0	0	0	0	0	0	0	0	0	1	0	0	1	0	0	0	0	1	0	0	0	0	0	0	0	0	0	0	0	0	0	4	5	65	8	0	0	0	0
53.2395	1	175.3	79.38	25.8314	1.96605	0	1	0	0	0	0	0	0	0	0	0	0	0	0	0	1	1	0	0	0	0	0	0	0	0	0	0	0	0	0	0	0	0	0	0	0	2	5	77	11	0	1	0	0
63.865	1	182.9	106.4	31.8064	2.32502	1	0	0	0	0	0	0	0	0	0	0	1	1	1	0	0	0	0	0	0	0	0	0	0	0	0	0	2	0	0	0	0	0	0	0	0	3	5	96	10	0	0	0	0
75.9571	1	172.5	65	21.8442	1.76482	0	0	1	0	0	0	0	0	0	0	0	0	0	0	0	0	0	0	0	0	0	0	0	0	0	2	0	2	0	0	0	0	0	0	0	0	4	8	77	10	1	1	0	0
67.9694	0	160	57.9	22.6172	1.60416	0	0	0	0	0	0	0	0	0	0	0	0	0	0	0	0	0	0	0	0	0	0	0	0	0	0	0	0	0	0	0	0	0	0	0	0	3	3	123	14	0	1	0	1
65.0747	0	165	104.8	38.494	2.19165	0	1	0	0	0	0	0	0	0	0	0	0	0	0	0	0	1	1	0	0	0	0	0	0	0	0	0	0	0	0	1	0	0	0	0	0	3	5	82	13	0	1	0	0
82.638	1	157	108.8	44.1397	2.17828	0	1	0	0	0	0	0	0	0	0	0	0	0	0	0	0	0	0	0	0	0	0	0	0	0	0	0	0	0	0	0	0	0	0	0	0	5	6	85	9	0	0	0	0
82.0444	1	167	104.6	37.5058	2.20279	1	1	1	0	0	0	0	1	0	0	0	1	0	1	0	0	0	0	0	0	0	0	0	0	0	0	0	0	0	0	0	0	0	0	0	0	5	6	77	5	0	0	0	0
74.5599	1	175	97.1	31.7061	2.17259	1	1	1	0	0	0	0	1	0	0	0	1	0	1	1	0	0	0	0	0	0	0	1	0	0	2	0	0	0	0	0	0	0	0	0	0	4	8	108	11	0	0	0	0
47.6138	1	180.3	86.5	26.6088	2.0814	0	0	0	0	0	0	0	0	0	0	0	0	0	0	0	0	0	1	0	0	0	0	0	0	0	0	0	0	0	1	0	0	0	0	0	0	1	1	87	7	0	0	0	0
64.2843	0	167.6	74.2	26.4153	1.85861	0	0	0	0	0	0	0	0	0	0	0	0	0	0	0	1	1	0	0	0	0	0	0	0	0	0	0	0	0	0	0	0	0	0	0	0	3	4	116	16	0	0	0	1
48.0213	1	192	102.5	27.8049	2.33809	1	0	0	0	0	0	0	1	0	0	0	0	0	0	0	0	0	0	0	0	0	0	0	0	0	0	0	0	0	0	0	0	0	0	0	0	1	1	146	13	1	0	0	0
61.0307	0	165.1	104.4	38.3007	2.18813	0	0	0	0	0	0	0	0	0	0	0	0	0	0	0	0	0	0	0	0	0	0	0	0	0	0	0	0	0	0	0	0	0	0	0	0	3	3	74	10	0	0	0	0
77.711	0	161	46.2	17.8234	1.43742	0	0	0	0	0	0	0	0	0	0	0	0	0	0	0	0	0	0	0	0	0	0	0	0	0	0	0	0	0	0	0	0	0	0	0	0	4	4	81	9	0	1	0	0
52.9343	0	157	107	43.4095	2.16018	1	1	1	0	0	0	1	1	0	0	0	1	0	1	0	1	1	0	0	0	0	0	1	0	0	0	0	0	0	0	0	0	0	0	0	0	2	5	54	1	0	0	0	0
82.5933	0	168	103.5	36.6709	2.19773	1	1	1	0	0	0	0	0	0	0	0	0	0	0	0	0	0	0	0	0	0	0	0	0	0	0	0	0	0	0	0	0	0	0	0	0	5	6	119	10	0	0	0	0
71.586	1	179	84.7	26.4349	2.05219	0	0	0	0	0	0	0	0	0	0	0	0	0	0	0	1	1	0	0	0	0	0	0	1	0	2	0	0	0	0	0	0	0	0	0	0	4	8	113	11	0	1	1	1
61.3215	0	165.1	81.9	30.0462	1.93805	0	1	0	0	0	0	0	0	0	0	0	0	0	0	0	0	0	0	0	0	0	0	0	0	0	0	0	0	0	0	0	0	0	0	0	0	3	4	202	20	0	0	0	0
56.7054	1	183	128.3	38.3111	2.5538	0	0	0	0	0	0	0	0	0	1	0	0	0	0	0	0	0	0	0	0	0	0	0	0	0	0	0	0	0	0	0	0	0	0	0	0	2	2	141	18	0	0	0	0
86.9025	1	170	118.2	40.8997	2.36256	0	0	0	0	0	0	0	0	0	0	0	0	0	0	0	0	0	0	0	0	0	0	0	0	1	0	0	0	0	1	0	0	0	0	0	0	5	6	95	10	0	0	0	0
91.176	0	157	57.4	23.2869	1.58218	1	0	0	0	0	0	1	0	0	0	0	0	0	0	0	0	0	0	0	0	0	0	0	0	0	2	0	0	0	0	0	0	0	0	0	0	6	8	99	10	0	0	0	0
54.112	1	180	170.4	52.5926	2.9189	0	0	0	0	0	0	0	0	0	0	0	0	0	0	0	0	0	0	0	0	0	0	0	0	0	0	0	0	0	0	0	0	0	0	0	0	2	2	91	12	0	0	0	0
69.6142	0	166	65.1	23.6246	1.73258	1	1	0	1	0	0	0	0	1	0	0	0	0	0	0	0	0	1	0	0	1	1	0	0	0	0	0	0	0	0	0	0	0	0	3	0	3	8	132	15	0	0	0	0
54.2196	1	175	110.9	36.2122	2.32185	1	1	1	0	0	0	0	0	0	0	0	1	1	1	1	1	1	1	0	0	0	1	0	0	0	0	0	0	0	1	0	0	0	0	3	0	2	8	88	12	1	1	1	1
48.0851	1	185	201.5	58.8751	3.2179	0	0	0	0	0	0	0	0	0	0	0	0	0	0	0	0	0	0	0	0	0	0	0	0	0	0	0	0	0	1	0	0	0	0	0	0	1	1	112	14	0	0	0	0
81.9049	1	175	72.4	23.6408	1.87602	1	1	1	1	0	0	1	0	0	0	0	0	0	0	0	0	0	0	0	0	0	0	0	1	1	0	0	0	0	0	0	0	0	0	0	0	5	8	145	11	1	1	0	0
44.8204	1	191	169.6	46.49	2.9997	0	1	0	0	0	0	0	0	0	0	0	0	0	0	0	0	0	1	0	0	0	0	0	0	0	0	0	0	0	0	0	0	0	0	0	0	1	2	85	11	1	1	1	0
57.576	0	160	62.9	24.5703	1.67199	0	0	0	1	0	0	0	0	0	0	0	0	0	0	0	1	1	1	0	0	0	0	0	0	0	0	0	0	0	0	1	0	0	0	0	0	2	3	61	4	0	1	0	0
72.1799	1	169	72	25.2092	1.83848	1	0	1	0	0	0	0	1	0	0	0	0	0	0	0	0	0	0	0	0	0	0	0	0	0	2	0	0	0	0	0	0	0	0	0	6	4	12	120	8	1	1	0	1
79.4024	1	172	95.8	32.3824	2.13942	1	0	0	0	0	0	0	0	0	0	0	0	0	0	0	1	1	1	0	0	0	0	0	0	0	0	2	2	0	0	0	0	0	0	0	0	4	9	111	11	1	0	0	0
55.6407	0	165	80.6	29.6051	1.92202	1	0	0	0	0	0	0	0	0	0	0	1	0	1	0	1	1	1	0	0	1	0	1	0	0	2	0	0	0	1	0	0	0	0	0	0	2	6	70	10	0	0	0	0
76.0537	1	188	81	22.9176	2.0567	1	0	1	1	0	0	0	0	0	0	0	1	0	1	0	0	0	0	0	0	0	0	0	0	0	0	0	0	0	0	0	0	0	0	0	0	4	4	102	12	0	1	0	1
42.1045	1	170	61.7	21.3495	1.70693	0	0	0	0	0	0	0	0	0	0	0	1	1	0	0	0	0	1	0	0	0	0	0	0	0	0	0	0	0	1	0	0	0	0	0	0	1	1	87	13	0	1	0	1
93.2646	0	166	80.4	29.1769	1.92544	1	0	0	0	0	0	0	1	0	0	0	0	0	0	0	0	0	0	0	0	1	0	0	1	0	0	0	0	0	0	0	0	0	0	0	0	6	7	121	12	0	1	0	0
51.6192	1	186	106.7	30.8417	2.34794	0	1	0	0	0	0	0	0	0	0	0	0	0	0	0	1	1	0	0	0	0	0	0	0	0	0	0	0	0	0	0	0	0	0	0	0	2	5	80	11	0	0	0	0
80.6017	0	170	92.6	32.0415	2.09112	1	1	1	1	0	0	0	0	0	0	0	0	0	0	0	0	0	0	0	0	0	0	0	0	0	2	0	0	0	0	0	0	0	0	0	0	5	8	75	3	0	0	0	0
58.2502	1	179.5	140.9	43.7303	2.65055	1	0	1	0	0	0	0	1	0	0	0	0	0	0	1	0	0	0	0	0	0	0	0	0	0	0	0	2	0	0	0	0	0	0	0	0	2	4	149	18	1	1	0	1
60.3406	0	165	129	47.3829	2.43156	0	0	0	0	0	0	0	0	0	0	0	0	0	0	0	0	0	0	0	0	0	0	0	0	0	0	0	0	0	0	0	0	0	0	0	0	3	3	121	15	0	1	0	1
84.8318	1	181	74.8	22.832	1.93927	0	0	0	0	0	0	0	0	0	0	0	0	0	0	0	0	1	0	0	0	0	0	0	0	0	0	0	0	0	0	0	1	0	0	0	0	5	6	120	7	1	1	0	1
56.8651	0	167	74.1	26.5696	1.85403	0	0	0	0	0	0	0	0	0	0	0	0	0	0	0	0	1	0	0	0	0	0	0	0	0	0	0	0	0	0	1	0	0	0	0	0	2	3	67	13	1	1	0	1
68.1658	1	190	134.5	37.2576	2.66432	1	0	0	0	0	0	0	1	0	0	0	1	1	1	0	0	0	0	0	0	0	0	0	0	0	0	0	0	0	0	0	0	0	0	0	0	3	3	83	10	1	1	0	0
58.9206	0	169	101	35.3629	2.17747	0	0	0	0	0	0	0	0	0	0	0	0	0	0	0	0	0	0	0	0	0	0	0	0	0	0	0	0	0	0	0	0	0	0	0	0	2	2	67	8	1	0	0	0
66.1422	1	173	115.2	38.4911	2.35287	0	1	1	0	0	0	0	0	0	0	0	0	0	0	0	0	0	0	0	0	0	1	0	0	0	0	0	0	0	0	0	0	0	0	3	0	3	8	113	14	0	0	0	1
80.1753	0	160	65.6	25.625	1.7075	1	0	1	0	0	0	0	0	0	0	0	0	0	0	0	1	1	1	0	0	0	0	0	1	0	0	2	0	0	0	0	0	0	0	0	0	5	9	98	8	0	1	0	0
83.6278	0	152	109.8	47.5242	2.15314	0	0	0	0	0	0	0	0	0	0	0	0	0	0	0	0	1	0	0	0	0	0	0	0	0	2	0	0	0	0	1	0	0	0	0	0	5	8	112	10	0	0	0	0
59.5289	1	178	112	35.3491	2.35325	0	1	0	0	0	0	0	0	0	0	0	0	0	0	0	0	0	0	0	0	0	0	0	0	0	0	0	0	0	0	0	0	0	0	0	0	2	3	86	8	0	0	0	1
50.7479	0	162	82.7	31.512	1.92912	0	0	0	0	0	0	0	0	0	0	0	0	0	0	0	0	1	0	0	0	0	0	0	0	0	0	0	0	0	0	0	1	1	0	0	0	2	4	102	11	1	0	0	1
72.4492	1	168.8	75.6	26.5324	1.88276	1	0	0	1	0	0	1	1	0	0	0	0	0	0	0	0	0	0	0	0	0	0	0	0	0	0	0	2	0	0	0	0	0	0	0	0	4	6	65	7	0	0	0	0
41.5212	1	175	131.1	42.8082	2.52446	0	0	0	0	0	0	0	0	0	0	0	0	0	0	0	0	1	0	0	0	0	0	0	0	0	0	0	0	0	0	1	0	0	0	0	0	1	2	63	6	0	0	0	0
56.5435	0	153	70.3	30.0312	1.72851	1	1	0	0	0	0	0	1	0	0	0	1	1	1	0	0	0	0	0	0	0	0	1	0	0	2	0	0	0	0	0	0	0	0	0	6	2	14	81	9	0	1	0	0
83.6784	0	135	63.6	34.8971	1.54434	1	1	1	1	0	0	0	0	0	0	0	0	0	0	1	1	1	0	0	0	0	0	0	0	0	0	0	0	0	0	1	0	0	0	0	0	5	9	97	10	1	1	1	0
86.2749	1	182	68.4	20.6497	1.85957	1	0	0	0	0	0	1	0	0	0	0	0	0	0	0	0	0	0	0	0	1	0	0	0	0	0	0	0	0	0	0	0	0	0	0	0	5	5	66	6	1	0	0	0
55.2381	1	182	109	32.9067	2.34746	1	1	1	1	0	0	0	0	0	0	0	0	0	0	0	0	0	1	0	0	0	0	0	0	0	2	0	0	0	0	0	0	0	0	0	6	2	12	114	11	0	0	0	0
68.629	1	174	96.7	31.9395	2.16191	0	0	0	0	0	0	0	0	0	0	0	0	0	0	0	0	1	0	0	0	0	0	0	0	0	2	0	0	0	0	0	1	0	0	0	6	3	12	83	7	0	0	0	0
73.1028	0	156	92.1	37.8452	1.99775	0	1	1	0	0	0	0	0	0	0	0	0	0	0	1	0	0	0	0	0	1	0	0	0	0	0	0	0	0	0	0	0	0	0	0	0	4	7	114	9	1	1	0	1
76.9712	1	182.9	112	33.4804	2.38542	1	1	1	1	0	0	1	1	0	0	0	0	0	0	0	0	0	0	0	0	0	0	0	0	0	0	0	0	0	0	0	0	0	0	0	0	4	5	131	17	0	0	0	1
46.1315	1	150	68.7	30.5333	1.69189	0	0	0	0	0	0	0	0	0	0	0	1	0	1	0	0	0	0	0	0	0	0	0	0	0	0	0	0	0	0	0	0	0	0	0	0	1	1	79	12	1	0	1	1
71.9257	0	150	76.9	34.1778	1.79002	0	0	0	0	0	0	0	0	0	0	0	0	0	0	1	0	0	0	0	0	1	0	0	0	0	0	0	0	0	0	0	0	0	0	0	0	4	4	89	10	0	1	0	0
77.1523	1	181	90.5	27.6243	2.13311	1	1	1	1	1	0	0	1	1	0	0	1	0	1	0	1	1	0	0	0	0	0	0	1	0	0	0	0	0	1	0	0	0	0	0	0	4	10	95	9	0	1	1	1
47.2686	1	177.8	76.8	24.2939	1.94758	0	0	0	0	0	0	0	0	0	0	0	0	0	0	0	0	0	0	0	0	0	0	0	0	0	0	0	0	0	0	0	0	0	0	0	0	1	1	97	11	1	1	0	0
65.0965	1	154.9	50	20.8385	1.46676	0	0	0	0	0	0	0	0	0	0	0	0	0	0	0	0	0	0	0	0	0	0	0	0	0	0	0	0	0	0	0	0	0	0	0	0	3	3	107	11	0	1	1	1
40.6779	1	172.7	76.8	25.75	1.91944	0	0	0	0	0	0	0	1	0	0	0	0	0	0	0	0	0	1	0	0	0	0	0	0	0	0	0	2	0	0	0	0	0	0	0	0	1	3	72	12	0	1	0	1
70.3352	1	173	76.5	25.5605	1.91735	0	0	0	1	0	0	0	1	0	0	0	1	1	1	0	0	0	0	0	0	1	1	0	0	0	2	2	0	0	0	0	0	1	0	3	0	4	13	68	3	0	0	0	0
73.8961	0	144	49.4	23.8233	1.4057	0	0	0	0	0	0	0	0	0	0	0	0	0	0	0	0	0	0	0	0	0	0	0	0	0	0	0	0	0	0	0	0	0	0	0	0	4	4	84	8	1	0	0	0
54.9421	1	180	81.8	25.2469	2.02237	0	0	0	0	0	0	0	0	0	0	0	1	1	0	0	0	0	0	0	0	0	0	0	0	0	2	0	0	0	0	0	0	0	0	0	0	2	4	79	9	1	1	1	0
69.7284	1	163	87.5	32.9331	1.99043	0	0	0	0	0	0	0	0	0	0	0	0	0	0	0	0	0	0	0	0	0	0	0	0	0	0	0	0	0	0	0	0	0	0	0	0	3	3	101	13	1	1	0	1
53.7318	0	159	75.5	29.8643	1.82608	0	0	0	0	0	0	0	0	0	0	0	0	0	0	1	1	1	1	0	0	1	1	0	0	0	0	0	0	0	1	0	0	0	0	3	0	2	7	124	15	1	1	0	0
47.6164	0	162	70.6	26.9014	1.78241	0	0	0	0	0	0	0	0	0	0	0	0	0	0	0	0	0	0	0	0	0	0	0	0	0	0	0	0	0	0	0	0	0	0	0	0	1	2	123	12	0	0	0	1
66.6791	0	165.5	52.7	19.2404	1.55651	0	0	0	0	0	0	0	0	0	0	0	0	0	0	0	1	1	0	0	0	1	0	0	0	0	0	0	0	0	0	0	0	0	0	0	0	3	4	58	5	0	1	1	1
67.8435	0	159	104.5	41.3354	2.14835	0	0	0	0	0	0	0	0	0	0	0	0	0	0	0	0	0	0	0	0	0	0	0	0	0	0	0	0	0	0	0	0	0	0	0	0	3	3	88	15	1	0	0	1
83.818	0	170	115.9	40.1038	2.33946	1	0	0	0	0	0	0	0	0	0	0	1	0	1	0	0	0	0	0	0	0	0	0	0	0	0	0	0	0	0	0	0	1	0	0	0	5	6	77	8	0	0	0	0
91.9136	1	168	72.8	25.7937	1.84319	1	0	1	0	0	0	1	1	0	0	0	0	0	0	0	0	0	0	0	0	0	0	0	0	0	2	0	0	0	0	0	0	0	0	0	0	6	8	119	14	0	0	0	1
42.0353	0	172.5	83.8	28.1622	2.00385	0	0	0	0	0	0	0	0	0	0	0	1	0	1	0	0	1	1	0	0	0	0	0	0	0	0	0	0	0	0	1	0	0	0	0	0	1	2	136	13	1	1	0	1
42.5815	0	170	67.4	23.3218	1.78403	0	0	0	0	0	0	0	0	0	0	0	0	0	0	0	0	0	0	0	0	0	0	0	0	0	0	0	0	0	0	0	0	0	0	0	0	1	1	65	7	0	0	0	1
54.3746	0	167	86.8	31.1234	2.00663	0	1	0	0	0	0	0	0	0	0	0	0	0	0	0	0	0	0	0	0	0	0	0	1	0	0	0	0	0	0	0	0	0	0	0	0	2	4	127	17	0	0	0	0
61.7646	0	155	52.7	21.9355	1.50633	0	1	0	0	0	0	0	0	0	0	0	0	0	0	0	1	1	0	0	0	0	0	0	0	0	0	0	0	0	0	0	0	0	0	0	0	3	5	89	10	0	0	0	0
64.5497	1	158	70.1	28.0804	1.75403	0	0	0	0	0	0	0	0	0	0	0	0	0	0	0	0	0	0	0	0	0	0	0	0	0	0	0	0	0	0	0	0	0	0	0	0	3	3	64	6	0	0	0	0
69.7182	0	164	84.7	31.4917	1.96432	1	0	1	1	0	0	1	1	0	0	1	1	0	1	0	0	0	0	0	0	0	0	0	0	0	2	0	0	0	0	0	0	0	0	0	6	3	11	103	13	0	1	0	1
79.8541	1	0	0		0	0	0	0	0	0	0	0	0	0	0	0	0	0	0	0	0	0	0	0	0	0	0	1	0	0	0	0	0	0	0	0	0	0	0	0	0	4	5	55	8	0	0	0	0
78.1438	1	162	88.3	33.6458	1.99336	0	0	0	0	0	0	0	0	0	0	0	0	0	0	0	0	0	0	0	0	0	1	0	1	0	2	0	0	0	0	0	0	0	0	0	0	4	8	82	9	0	0	0	0
74.2908	0	159	58.7	23.219	1.61015	0	1	0	0	0	0	0	0	0	0	0	0	0	0	0	0	0	0	0	0	0	0	0	0	0	2	0	0	0	0	0	0	0	0	0	0	4	7	83	13	1	0	0	0
73.5784	1	171.5	82.8	28.1515	1.98608	1	1	0	0	0	0	0	1	0	0	0	0	0	0	1	0	0	0	0	0	0	0	0	0	0	0	2	0	0	0	0	0	0	0	0	0	4	7	184	20	1	0	0	1
71.7634	1	178	107.3	33.8657	2.30334	0	0	0	0	0	0	0	0	0	0	0	0	0	0	0	0	0	0	0	0	0	0	0	0	0	0	0	0	0	0	0	0	0	0	0	0	4	4	109	10	0	0	0	0
61.0512	1	187	102.3	29.2545	2.30519	1	0	1	0	0	0	0	0	0	0	0	0	0	0	0	0	0	0	0	0	0	0	0	0	0	0	0	0	0	0	0	0	0	0	0	0	3	3	45	6	0	1	0	0
87.596	1	175	73.6	24.0327	1.8915	0	0	0	0	0	0	0	0	0	0	0	0	0	0	0	0	0	0	0	0	0	0	0	0	0	0	0	0	0	0	0	0	0	0	0	0	5	5	87	5	0	0	0	0
59.7905	0	160	115.8	45.2344	2.26863	0	1	0	0	0	0	0	0	0	0	0	0	0	0	0	0	0	0	0	0	0	0	0	0	0	0	0	0	0	0	0	0	0	0	0	0	2	3	95	7	0	1	0	0
69.4766	0	170	88.9	30.7612	2.04892	0	0	0	0	0	0	0	0	0	0	0	0	0	0	0	0	0	0	0	0	0	0	0	0	0	0	0	0	0	0	0	0	0	0	0	0	3	3	82	9	0	1	1	0
89.9549	1	181	86.1	26.2812	2.0806	1	0	1	0	0	0	1	0	0	1	0	0	0	0	0	0	0	0	0	0	0	0	0	1	0	2	0	0	0	0	0	0	0	0	0	0	5	8	99	9	0	0	0	0
43.1443	1	173	238.5	79.6886	3.38545	1	0	0	0	0	0	0	0	0	0	0	0	0	0	1	0	0	0	0	0	0	0	0	0	0	0	0	0	0	0	0	0	0	0	0	0	1	1	60	11	1	0	0	1
81.9564	1	161	66	25.462	1.71804	1	0	1	1	0	0	0	1	0	0	0	0	0	0	0	0	1	0	0	0	0	0	0	0	0	0	0	0	0	0	0	1	1	0	0	0	5	7	103	11	1	1	0	0
53.324	1	190	67.4	18.6704	1.88606	1	0	0	0	0	0	0	1	0	0	0	1	0	1	0	1	1	1	0	0	0	0	0	0	0	2	0	0	0	1	0	0	0	0	0	0	2	5	61	5	0	1	0	0
71.8279	0	160	77.6	30.3125	1.85712	0	0	0	0	0	0	0	0	0	0	0	0	0	0	0	0	0	0	0	0	0	0	0	0	0	0	0	0	0	0	0	0	0	0	0	0	4	4	59	7	0	1	0	0
78.6754	1	178	72.6	22.9138	1.89464	0	0	0	0	0	0	0	1	1	1	0	1	1	1	0	0	0	0	0	0	0	0	1	1	0	0	0	0	0	0	0	0	0	0	0	0	4	6	58	6	0	1	1	1
89.9146	0	160	74.4	29.0625	1.81842	0	1	0	0	0	0	0	0	0	0	0	0	0	0	0	0	0	0	0	0	0	0	0	0	1	0	0	0	0	0	0	0	0	0	0	0	5	7	149	12	1	1	0	1
72.798	0	155	53.2	22.1436	1.51346	0	0	0	0	0	0	0	0	0	0	0	0	0	0	0	0	0	0	0	0	0	0	0	0	0	0	0	2	0	0	0	0	0	0	0	0	4	6	114	10	0	0	0	0
51.8657	1	188	88	24.8981	2.14372	0	1	0	0	0	0	0	0	0	0	0	0	0	0	0	0	0	0	0	0	0	0	0	0	0	0	0	0	0	0	0	0	0	0	0	0	2	3	76	5	0	0	0	0
60.3503	1	168	91.8	32.5255	2.06978	0	0	0	0	0	0	0	0	0	0	0	0	0	0	0	0	0	0	0	0	0	0	0	0	0	0	0	0	0	0	0	0	0	0	0	0	3	3	89	12	0	0	0	1
40.8047	0	177	76	24.2587	1.93305	0	1	0	0	0	0	0	0	0	0	0	0	0	0	0	0	0	0	0	0	0	0	1	0	0	0	0	0	0	1	0	0	0	0	0	0	1	3	93	9	0	0	0	0
79.7742	1	178	87	27.4587	2.07405	1	1	1	1	0	0	1	1	0	0	0	0	0	0	0	1	1	0	0	0	0	0	0	0	0	0	0	0	0	0	0	1	0	0	0	0	4	6	83	3	0	1	0	0
64.2456	0	147.5	68.6	31.5312	1.67651	0	0	0	0	0	0	0	0	0	0	0	0	0	0	0	0	1	0	0	0	0	0	0	0	0	2	0	0	0	0	1	0	1	0	0	6	3	13	114	10	0	1	0	0
86.7256	0	152	81.5	35.2753	1.85502	0	0	0	0	0	0	0	0	0	0	0	0	0	0	0	0	0	0	0	0	0	0	0	1	0	0	0	0	0	0	0	0	0	0	0	0	5	6	71	2	0	0	0	0
54.7529	1	165	103.1	37.8696	2.1738	0	1	0	0	0	0	0	0	0	0	0	0	0	0	0	0	0	0	0	0	0	0	0	0	0	0	0	0	0	0	0	0	0	0	0	0	2	3	61	5	0	0	0	0
83.134	0	157	64	25.9645	1.67066	1	1	1	1	0	0	0	0	0	0	1	0	0	0	1	0	0	0	0	0	0	0	0	0	0	0	0	0	0	0	0	0	0	0	0	0	5	6	80	8	0	0	0	0
85.9676	0	159	83.7	33.1079	1.92269	0	0	0	0	0	0	0	0	0	0	0	0	0	0	0	0	0	0	0	0	0	0	0	0	0	0	0	0	0	0	0	0	0	0	0	0	5	5	95	6	0	1	0	0
64.6036	0	170	53.8	18.6159	1.59391	1	0	1	1	0	0	0	1	0	0	0	1	0	1	0	1	1	1	0	0	0	0	0	1	0	0	0	0	0	1	1	0	0	0	0	0	3	5	58	6	1	0	0	0
57.0933	1	175	70.9	23.151	1.85648	1	0	1	1	0	0	0	1	0	0	0	0	0	0	0	0	0	1	0	0	1	0	0	0	0	2	0	0	0	0	0	0	0	0	0	6	2	10	67	5	0	0	0	0
68.0355	1	189	100.2	28.0507	2.29358	1	1	1	1	1	0	1	1	0	0	0	0	0	0	0	1	1	1	0	0	0	0	0	0	0	0	0	0	0	1	1	0	0	0	0	0	3	8	69	10	1	0	0	0
77.994	0	143	85.6	41.8602	1.84397	1	1	1	1	0	0	0	1	0	0	0	0	0	0	0	0	0	0	0	0	0	0	0	0	1	2	0	0	0	0	0	0	0	0	0	0	4	10	66	4	0	1	0	0
63.9426	1	170	94.3	32.6298	2.11023	1	0	1	0	0	0	0	0	0	0	0	0	0	0	0	0	0	0	0	0	0	0	0	0	0	0	0	0	0	0	0	0	0	0	0	0	3	3	57	4	0	0	0	1
56.2286	0	164	40.8	15.1695	1.36333	0	0	0	0	0	0	0	0	0	0	0	0	0	0	0	0	1	0	0	0	0	0	0	0	0	0	0	0	0	0	0	1	0	0	0	0	2	3	155	22	1	1	0	1
65.4829	1	180	103.8	32.037	2.27816	1	1	1	0	0	0	0	1	0	0	0	0	0	0	0	0	0	0	0	0	0	1	0	0	0	0	0	0	0	1	0	0	0	0	3	0	3	10	125	13	0	0	0	0
74.9298	1	178	94.3	29.7627	2.15931	1	0	0	1	0	0	0	1	0	0	0	0	0	0	0	0	0	0	0	0	0	0	0	0	0	0	0	0	0	0	0	0	0	0	0	0	4	5	100	10	0	0	0	0
82.9253	0	161	63.1	24.3432	1.67987	1	0	1	0	0	0	0	1	0	0	0	1	1	1	0	0	0	0	0	0	1	0	0	1	0	2	0	0	0	1	0	0	0	0	0	0	5	8	94	8	0	0	0	1
87.3966	1	175	46.2	15.0857	1.49861	0	0	0	0	0	0	0	0	0	0	0	0	0	0	0	1	1	0	0	0	0	0	0	0	0	0	0	0	0	0	0	0	0	0	0	0	5	6	51	1	0	1	0	0
37.9454	1	180.3	100.2	30.8231	2.24017	0	1	0	0	0	0	0	0	0	0	0	0	0	0	0	0	0	0	0	0	1	0	0	0	0	0	0	0	0	0	0	0	0	0	0	0	0	1	30	4	0	0	0	0
88.9242	1	183	73.6	21.9774	1.93425	0	0	0	0	0	0	0	0	0	0	0	0	0	0	0	1	1	0	0	0	0	0	0	0	0	0	0	0	0	0	0	0	0	0	0	0	5	6	65	8	0	0	0	0
57.8318	0	165	91.5	33.6088	2.04786	1	1	1	0	0	0	0	0	0	0	0	1	1	0	1	0	1	0	0	0	0	0	0	1	0	0	0	0	0	0	1	0	0	0	0	0	2	7	119	13	0	1	0	1
83.7719	0	153	78	33.3205	1.82071	0	0	0	0	0	0	0	0	0	0	0	0	0	0	0	0	0	0	0	0	0	0	0	0	1	0	0	0	0	0	0	0	0	0	0	0	5	6	177	18	0	1	0	0
83.0634	0	160	38.1	14.8828	1.30128	1	0	0	0	0	0	0	1	0	0	0	0	0	0	0	1	1	0	0	0	0	0	0	0	0	2	0	0	0	0	0	1	0	0	0	0	5	8	73	8	1	0	0	1
26.1578	0	160	100	39.0625	2.10819	0	0	0	0	0	0	0	0	0	0	0	0	0	0	0	0	0	0	0	0	0	0	0	0	0	0	0	0	0	0	0	0	0	0	0	0	0	0	80	10	1	0	0	0
67.3013	1	175	101.1	33.0122	2.21689	1	1	1	1	0	0	0	0	0	0	0	0	0	0	1	1	1	0	0	0	0	0	0	0	0	2	0	0	0	0	1	0	0	0	0	0	3	7	52	4	0	1	0	0
69.4349	1	173	90.5	30.2382	2.08543	0	0	0	0	0	0	0	0	0	0	0	0	0	0	0	0	0	0	0	0	0	0	0	0	0	0	0	0	0	0	0	0	0	0	0	0	3	3	46	9	0	0	0	1
34.1409	0	162	105	40.0091	2.17371	0	0	1	0	0	0	0	0	0	0	0	0	0	0	1	0	0	0	0	0	0	1	0	0	0	0	0	0	0	0	0	0	0	0	0	0	0	1	51	4	0	1	0	0
79.0928	1	168	54.7	19.3807	1.59771	0	0	0	0	0	0	0	0	0	1	0	0	0	0	0	0	0	0	0	0	0	0	0	0	0	0	0	0	0	0	0	0	0	0	0	0	4	4	68	6	0	1	0	0
80.2925	0	167	71.9	25.7808	1.8263	1	0	1	0	0	0	0	1	0	0	0	1	0	1	0	0	0	0	0	0	0	0	0	1	0	2	2	2	0	0	0	0	0	0	0	0	5	13	131	13	0	1	1	0
86.2034	1	167.5	91.9	32.7556	2.06783	1	1	1	1	0	0	0	1	0	0	0	0	0	0	0	0	0	0	0	0	1	0	0	1	0	2	0	0	0	0	0	0	0	0	0	0	5	12	69	4	0	0	0	0
53.1393	0	167	58.9	21.1194	1.65297	1	0	0	0	0	0	0	0	0	0	0	0	0	0	0	0	0	0	0	0	0	1	0	0	0	2	0	0	0	0	0	0	0	0	0	0	2	5	115	13	0	0	0	0
61.0839	1	200	91.7	22.925	2.25709	1	0	0	1	0	0	1	1	0	0	1	1	0	1	1	0	0	0	0	0	0	0	0	0	0	2	0	2	0	0	0	0	0	0	0	0	3	7	70	12	0	1	0	0
86.3374	1	178	116.1	36.6431	2.39593	1	1	0	1	0	0	0	0	0	0	0	0	0	0	1	1	1	1	0	0	0	0	0	0	0	2	0	0	0	0	1	0	0	0	0	6	5	16	77	4	0	0	0	0
81.4987	1	170	114.7	39.6886	2.32731	1	1	1	0	0	0	0	1	0	0	0	0	0	0	0	1	1	0	0	0	0	0	0	0	0	0	0	0	0	0	0	0	0	0	0	0	5	7	82	8	1	1	0	0
60.1719	1	183	193	57.6309	3.13222	0	1	0	0	0	0	0	0	0	0	0	0	0	0	0	0	0	0	0	0	0	0	0	0	0	0	0	0	0	0	0	0	0	0	0	0	3	4	53	6	0	0	0	0
83.2662	1	164	72.1	26.807	1.81233	1	0	1	1	1	0	0	1	1	1	0	0	0	0	0	0	0	0	0	0	0	0	0	0	0	2	0	0	0	0	0	0	0	0	0	0	5	8	77	12	1	0	0	0
88.5665	1	168	105.2	37.2732	2.2157	1	0	1	0	0	0	0	0	0	0	0	0	0	0	1	0	0	0	0	0	0	1	0	0	0	0	0	0	0	0	0	0	0	0	0	0	5	6	96	8	0	0	0	0
39.8677	0	155	98.7	41.0822	2.06145	0	0	0	0	0	0	0	0	0	0	0	0	0	0	0	0	0	0	0	0	0	0	0	0	0	0	0	0	0	0	0	0	0	0	0	0	0	0	72	8	1	1	0	1
54.8053	0	199	100.4	25.3529	2.35582	0	0	0	0	0	0	0	0	0	0	0	0	0	0	0	0	0	0	0	0	0	0	0	0	0	0	0	0	0	0	0	0	0	0	0	0	2	2	126	15	1	0	0	1
60.8241	1	190	103.4	28.6427	2.33607	0	0	0	0	0	0	0	0	0	0	0	0	0	0	0	0	0	0	0	0	0	0	0	0	0	2	0	0	0	0	0	0	0	0	0	0	3	5	95	13	0	0	0	1
66.8283	0	170	84.3	29.1696	1.9952	1	0	0	0	0	0	0	1	0	0	0	1	0	1	0	0	1	0	0	0	0	0	0	0	0	0	0	0	0	0	0	1	1	0	0	0	3	5	67	3	0	1	0	1
53.3829	0	168	67.9	24.0575	1.78007	0	1	0	0	0	0	0	0	0	0	0	0	0	0	0	0	0	0	0	0	0	0	0	0	0	0	0	0	0	0	0	0	0	0	0	0	2	3	68	8	1	1	0	1
96.0866	0	165	72.6	26.6667	1.82414	0	0	0	0	0	0	0	0	0	0	0	0	0	0	0	0	0	0	0	0	0	0	0	0	0	2	0	0	0	0	0	0	0	0	0	6	6	14	102	4	1	1	0	0
54.9436	0	169	86.5	30.2861	2.01512	0	1	0	0	0	0	0	0	0	0	0	0	0	0	0	0	0	1	0	0	1	0	0	0	0	0	0	0	0	0	0	0	0	0	0	0	2	3	87	11	0	1	0	1
74.87	1	185.4	114.1	33.1945	2.42408	0	1	0	0	0	0	0	0	0	0	0	0	0	0	0	0	0	0	0	0	0	0	0	0	0	0	0	0	0	0	0	0	0	0	0	0	4	6	74	5	0	1	0	0
82.6103	1	164	68.4	25.4313	1.76522	0	0	0	0	0	0	0	0	0	0	0	0	0	0	0	0	0	0	0	0	0	0	0	0	0	0	0	0	0	0	0	0	0	0	0	0	5	5	76	8	0	0	0	0
87.5584	1	180	74.5	22.9938	1.93003	0	0	0	0	0	0	0	0	0	0	0	0	0	0	0	0	1	0	0	0	0	0	0	0	0	0	0	0	0	0	0	1	0	0	0	0	5	6	71	6	0	1	0	0
63.7025	0	162	121.6	46.3344	2.33923	1	1	1	1	0	0	1	0	0	0	0	0	0	0	1	0	0	0	0	0	0	0	0	0	0	0	0	0	0	0	0	0	0	0	0	0	3	7	107	12	1	1	0	1
80.3877	1	159	103.4	40.9003	2.13702	1	1	0	1	0	0	0	0	0	0	0	0	0	0	0	1	1	0	0	0	0	0	0	0	0	2	0	0	0	0	0	0	0	0	0	0	5	10	70	5	0	0	0	0
78.1046	1	160	78.5	30.6641	1.86786	0	1	1	1	0	0	1	1	0	0	0	1	0	1	1	0	0	0	0	0	0	0	0	0	0	2	0	0	0	0	0	0	1	0	0	0	4	8	53	4	0	0	0	0
71.0765	1	165	86.2	31.6621	1.98767	1	1	1	0	0	0	0	0	0	0	0	0	0	0	0	1	1	0	0	0	0	0	0	0	1	0	0	0	0	0	0	0	0	0	0	0	4	8	85	11	0	1	0	1
66.3844	1	180.3	99	30.454	2.22671	0	1	0	0	0	0	0	0	0	0	0	0	0	0	0	0	0	0	0	0	0	0	0	1	0	0	0	0	0	0	0	0	0	0	0	0	3	5	97	8	0	1	0	1
66.8485	1	190.5	97	26.7289	2.26559	0	0	0	0	0	0	0	0	0	0	0	0	0	0	0	0	0	0	0	0	0	0	0	1	0	2	0	0	0	0	0	0	0	0	0	0	3	6	105	9	0	0	0	0
54.094	1	185	117.7	34.3901	2.45936	0	1	1	1	0	0	0	0	0	0	0	0	0	0	0	0	0	0	0	0	0	0	0	0	0	0	0	0	0	0	0	0	0	0	0	0	2	4	57	4	0	1	0	0
65.3049	1	174	54.9	18.1332	1.62896	1	0	0	1	0	0	0	1	0	0	0	0	0	0	0	1	1	0	0	0	0	0	0	0	0	0	0	0	0	0	0	0	0	0	0	0	3	4	104	12	1	1	1	0
72.4516	1	168	118.8	42.0918	2.35457	0	0	0	0	0	0	0	0	0	0	0	0	0	0	0	1	1	0	0	0	0	0	0	0	0	0	0	0	0	0	0	0	0	0	0	0	4	5	69	7	0	1	0	1
83.0355	1	178	91.2	28.7842	2.12352	1	0	1	0	0	0	0	0	0	0	0	1	1	1	0	0	0	0	0	0	0	0	0	0	0	2	0	0	0	0	0	0	0	0	0	0	5	7	55	7	0	0	0	0
82.5047	1	176	96.4	31.1209	2.17092	1	1	1	1	1	0	0	1	0	0	0	0	0	0	0	0	0	1	0	0	0	0	0	1	0	2	0	0	0	0	0	0	0	0	0	0	5	11	94	11	1	0	0	0
50.0363	1	193.7	97.2	25.9064	2.2869	0	1	1	0	0	0	0	0	0	0	0	0	0	0	0	0	0	1	0	0	0	1	0	0	0	0	0	0	0	1	0	0	0	0	0	0	2	4	76	5	1	0	0	0
79.8203	0	153	60.3	25.7593	1.60086	0	0	0	0	0	0	0	0	0	0	0	0	0	0	0	0	0	0	0	0	0	0	1	0	0	0	0	0	0	0	0	0	0	0	0	0	4	5	88	6	1	1	0	1
83.8468	0	156	91.3	37.5164	1.98905	1	0	0	0	0	0	0	0	0	0	0	0	0	0	0	0	0	0	0	0	0	0	0	0	0	0	0	0	0	0	0	0	0	0	0	0	5	5	92	8	0	1	0	0
50.1706	0	157	76.2	30.914	1.82296	1	0	0	0	0	0	0	0	0	0	0	0	0	0	0	0	0	0	0	0	0	0	0	0	0	0	0	0	0	0	0	0	0	0	0	0	2	2	73	6	0	1	0	1
83.3237	1	175	127.9	41.7633	2.49346	1	1	1	1	0	0	0	0	0	0	0	0	0	0	1	0	0	0	0	0	1	0	0	0	0	0	0	0	0	0	0	0	0	0	0	0	5	6	95	13	0	1	0	0
80.8157	1	168	63.2	22.3923	1.71736	0	0	1	0	0	0	0	0	0	0	0	0	0	0	0	0	0	0	0	0	0	0	0	0	1	2	0	0	0	0	0	0	0	0	0	0	5	8	111	14	0	1	0	1
45.1157	0	176	50	16.1415	1.56347	0	0	0	0	0	0	0	0	0	0	0	0	0	0	0	0	0	0	0	0	0	0	0	0	0	2	0	0	0	0	0	0	0	0	0	0	1	3	47	9	0	1	0	0
50.926	0	167	73.8	26.462	1.85027	0	0	0	0	0	0	0	1	0	0	0	1	0	1	0	0	0	0	0	0	0	0	0	0	0	2	0	0	0	1	0	0	0	0	0	0	2	4	196	20	1	1	0	0
51.2513	0	169	119.8	41.9453	2.37149	1	0	0	0	0	0	1	1	0	0	0	0	0	0	0	0	0	0	0	0	0	0	0	0	0	2	0	0	0	0	0	0	0	0	0	6	2	10	145	18	1	0	0	0
46.0772	0	162.5	85.6	32.4166	1.96568	0	0	0	0	0	0	0	0	0	0	0	0	0	0	0	0	0	0	0	0	0	0	0	0	0	0	0	0	0	0	0	0	0	0	0	0	1	1	51	9	0	0	0	0
47.5256	0	159	49.9	19.7381	1.48456	0	0	0	0	0	0	0	0	0	0	0	0	0	0	0	0	0	0	0	0	0	0	0	0	0	0	0	0	0	0	0	0	0	0	0	0	1	1	128	21	1	0	0	1
77.0728	1	176	106.7	34.446	2.28395	1	1	0	0	0	0	1	0	0	0	0	0	0	0	0	0	0	0	0	0	0	0	1	0	0	0	0	0	0	0	0	0	0	0	0	0	4	6	96	10	1	1	0	0
71.4441	1	169	52	18.2066	1.56241	0	0	0	0	0	0	0	0	0	0	0	0	0	0	0	1	1	0	0	0	0	0	0	0	0	2	0	0	0	0	0	0	0	0	0	0	4	7	82	8	0	1	0	0
75.8908	1	183	96.3	28.7557	2.21252	1	0	1	1	0	0	0	1	0	0	0	1	1	1	1	0	0	0	0	0	0	0	0	0	0	0	0	0	0	0	0	0	0	0	0	0	4	4	57	5	0	0	0	0
78.6657	0	150	80.8	35.9111	1.83485	0	1	0	0	0	0	0	0	0	0	0	0	0	0	0	1	1	0	0	0	0	0	0	0	0	0	0	0	0	0	0	0	0	0	0	0	4	6	161	18	0	1	0	1
71.2573	1	176	118	38.094	2.40185	0	1	1	0	0	0	0	1	0	0	0	0	0	0	1	0	0	0	0	0	0	0	0	0	0	2	0	0	0	0	0	0	0	0	0	0	4	7	135	14	0	0	0	0
54.9188	1	170	88.4	30.5882	2.04315	1	0	1	0	0	0	0	1	0	0	0	0	0	0	0	1	1	0	0	0	0	0	0	0	0	0	0	0	0	1	0	0	0	0	0	0	2	4	75	10	1	1	0	1
71.731	1	178	72.2	22.7875	1.88941	0	1	0	0	0	0	0	0	0	0	0	0	0	0	0	0	0	0	0	0	0	0	0	0	0	0	0	0	0	0	0	0	0	0	0	0	4	8	83	12	0	1	0	0
67.2824	0	165	75.5	27.7319	1.86022	1	1	1	0	0	0	0	0	0	0	0	0	0	0	0	0	0	0	0	0	1	0	0	1	0	2	0	0	0	0	0	0	0	0	0	0	3	7	63	8	1	0	0	0
22.3628	1	184	78.9	23.3046	2.00815	0	0	0	0	0	0	0	0	0	0	0	0	0	0	0	0	1	0	0	0	0	0	0	0	0	0	0	0	0	0	1	0	0	0	0	0	0	1	68	10	0	1	0	0
69.6721	1	165	75.2	27.6217	1.85652	1	1	1	0	0	0	0	1	0	0	0	0	0	0	0	0	0	0	0	0	0	0	0	0	0	2	0	0	0	0	0	0	0	0	0	0	3	6	81	5	0	1	0	0
54.3813	1	168	96.4	34.1553	2.12101	0	1	0	0	0	0	0	0	0	0	0	0	0	0	0	0	0	0	0	0	0	0	0	0	0	0	0	0	0	0	0	0	0	0	0	0	2	3	109	11	0	1	0	0
84.8539	0	144	45.5	21.9425	1.34907	1	0	1	1	0	0	0	0	0	0	0	0	0	0	0	1	1	1	0	0	0	0	0	0	0	0	0	0	0	0	0	0	0	0	0	0	5	7	82	7	1	1	0	0
90.5346	1	188	75.7	21.4181	1.98827	1	0	0	0	0	0	0	0	1	0	0	0	0	0	0	0	0	0	0	0	0	0	0	0	0	2	0	0	0	0	0	0	1	0	0	0	6	9	78	2	0	0	0	0
66.6384	1	176	128.3	41.4192	2.50448	0	0	0	0	0	0	1	0	0	0	0	0	0	0	0	0	0	0	0	0	0	0	0	1	0	0	0	0	0	0	0	0	0	0	0	0	3	4	126	15	1	1	0	0
37.8444	1	186	87.3	25.2341	2.12379	1	0	1	0	0	0	0	0	0	0	0	0	0	0	0	0	0	1	0	0	0	0	0	0	0	0	0	0	0	0	0	0	0	0	0	0	0	0	78	13	1	1	0	1
81.2237	1	162	70.7	26.9395	1.78368	1	0	1	1	0	0	0	0	0	0	0	0	0	0	0	1	1	0	0	0	0	0	0	0	0	0	0	0	0	0	1	1	0	0	0	0	5	6	103	12	0	1	0	0
81.0933	0	160	85.5	33.3984	1.94936	1	1	1	1	0	0	0	0	0	0	0	0	0	0	0	0	0	0	0	0	0	0	0	1	1	2	0	0	0	0	0	0	0	0	0	0	5	10	121	9	0	1	0	1
36.5284	1	176	86.6	27.9571	2.05761	0	0	1	0	0	0	0	0	0	0	0	1	1	1	0	0	1	0	0	0	0	0	0	0	0	0	2	0	0	0	0	1	0	0	0	0	0	3	87	11	0	0	0	0
61.1245	0	170	73.6	25.4671	1.86428	0	0	0	0	0	0	0	0	0	0	0	0	0	0	0	0	0	0	0	0	0	0	0	0	0	0	0	0	0	0	0	0	0	0	0	0	3	3	90	11	0	1	0	1
64.7636	0	170	97	33.564	2.14022	0	1	0	0	0	0	0	0	0	0	0	0	0	0	0	0	0	0	0	0	0	0	0	0	0	0	0	0	0	0	0	0	0	0	0	0	3	4	127	9	0	0	0	0
71.4403	0	160	63.5	24.8047	1.67995	0	0	0	0	0	0	0	0	0	0	0	0	0	0	0	1	1	0	0	0	0	0	0	0	0	0	0	0	0	0	1	0	0	0	0	0	4	5	104	10	1	0	0	1
67.2059	1	183	96.4	28.7856	2.21367	1	1	0	0	0	0	0	1	0	0	0	0	0	0	0	1	1	0	0	0	0	0	0	0	0	0	0	0	0	0	0	0	0	0	0	0	3	5	72	9	1	0	0	0
60.3448	1	183	110.5	32.9959	2.37004	0	1	0	0	0	0	0	0	0	0	0	0	0	0	0	0	0	0	0	0	0	0	0	0	0	0	0	0	0	0	0	0	0	0	0	0	3	4	102	4	0	0	0	0
80.4463	1	177	101.5	32.3981	2.23392	0	0	0	0	0	0	0	0	0	0	0	0	0	0	0	0	0	0	0	0	0	0	0	0	0	0	0	0	0	0	0	0	0	0	0	0	5	6	110	14	1	1	0	1
69.2317	0	157	66.4	26.9382	1.7017	1	1	1	1	0	0	0	0	0	0	0	0	0	0	0	0	0	0	0	0	1	0	0	0	0	0	0	2	0	0	0	0	0	0	0	0	3	9	91	11	0	0	0	0
52.5786	0	172	74.9	25.3177	1.89171	1	0	0	0	0	0	0	1	1	0	1	0	0	0	0	0	1	0	0	0	0	0	0	0	0	0	0	0	0	0	0	1	0	0	0	0	2	3	72	8	0	0	0	1
86.4149	0	162	56.1	21.3763	1.58887	0	0	0	0	0	0	0	0	0	0	0	0	0	0	0	0	0	0	0	0	0	0	0	0	0	0	0	0	0	0	0	0	0	0	0	0	5	5	135	17	1	0	0	0
59.009	1	175	83.2	27.1673	2.01108	1	0	0	0	0	0	0	1	0	0	0	1	0	1	0	0	0	0	0	0	0	1	0	1	0	2	0	0	0	1	0	0	0	0	0	6	2	12	125	12	0	1	1	1
70.5971	1	183	98.6	29.4425	2.23879	0	1	0	0	0	0	0	0	0	0	0	0	0	0	0	0	1	0	0	0	0	0	0	0	0	0	0	0	0	0	1	0	0	0	0	0	4	6	49	6	0	0	0	0
69.1791	1	190	101	27.9778	2.3088	1	0	1	1	1	0	0	1	0	0	0	1	1	1	0	1	1	0	0	0	0	0	0	0	0	0	0	0	0	0	0	0	0	0	0	0	3	5	57	10	1	1	1	0
48.2619	1	174	88.3	29.165	2.06587	1	0	0	0	0	0	0	0	0	0	0	1	0	1	0	0	0	0	0	0	0	0	0	0	0	0	0	2	0	0	0	0	0	0	0	0	1	3	121	15	1	1	0	0
63.2925	0	163.2	66.6	25.0054	1.73758	0	0	0	0	0	0	0	0	0	0	0	1	1	1	0	0	0	0	0	0	0	1	0	0	0	0	0	2	0	0	0	0	0	0	3	0	3	9	184	17	0	1	0	1
80.2839	1	182	132.8	40.0918	2.5911	1	1	1	1	0	0	0	1	0	0	0	0	0	0	0	0	0	0	0	0	0	0	0	0	0	0	0	0	0	0	0	0	0	0	0	0	5	6	73	6	1	0	0	0
75.7875	0	160	69	26.9531	1.75119	0	1	0	0	0	0	0	0	0	0	0	0	0	0	0	0	0	0	0	0	0	0	0	0	0	0	0	0	0	0	0	0	0	0	0	0	4	5	89	8	0	1	0	0
63.8748	1	180	76.3	23.5494	1.9532	1	0	0	0	0	0	0	0	0	0	0	0	0	0	0	1	1	1	0	0	0	0	0	0	0	2	0	0	0	1	1	0	0	0	0	0	3	6	138	18	0	1	0	1
72.9277	0	162	72.3	27.5492	1.80375	0	0	0	0	0	0	0	0	0	0	0	0	0	0	0	0	0	0	0	0	0	0	0	0	0	0	0	0	0	0	0	0	1	0	0	0	4	5	62	4	0	0	0	0
81.3057	1	173	82.3	27.4984	1.98871	0	0	0	0	0	0	0	0	0	0	0	0	0	0	0	0	0	0	0	0	0	0	0	0	0	0	0	0	0	0	0	0	0	0	0	0	5	5	80	12	1	0	0	0
67.2171	0	160	90.5	35.3516	2.00555	0	1	1	0	0	0	0	0	0	0	0	0	0	0	0	0	0	0	0	0	0	0	0	0	0	0	0	0	0	0	0	0	1	0	0	0	3	5	110	13	1	0	0	1
90.0913	0	152	71	30.7306	1.73141	0	0	1	1	0	0	0	0	0	0	0	0	0	0	0	0	0	0	0	0	0	0	0	0	0	0	0	0	0	0	0	0	0	0	0	0	6	7	153	15	1	1	0	1
62.4547	1	178	110.9	35.0019	2.34166	0	1	0	0	0	0	0	0	0	0	0	0	0	0	0	1	1	0	0	0	0	0	0	0	0	0	0	0	0	0	0	0	0	0	0	0	3	5	130	16	0	0	0	0
70.4142	0	150	57.6	25.6	1.54919	0	1	0	0	0	0	0	0	0	0	0	0	0	0	0	0	0	0	0	0	0	0	0	0	0	0	0	0	0	0	0	0	0	0	0	0	4	6	156	14	1	1	0	1
80.7003	0	172	49.6	16.7658	1.53941	1	1	1	1	0	0	0	0	0	0	0	0	0	0	0	1	1	1	0	0	0	0	0	0	0	0	0	0	0	0	0	0	0	0	0	0	5	7	173	17	1	0	0	1
74.4124	0	164	103.3	38.4072	2.16931	1	1	1	1	0	0	0	0	0	0	0	1	1	1	1	1	1	0	0	0	0	0	0	0	0	2	0	2	0	0	1	0	0	0	0	0	4	11	93	9	1	1	0	1
85.016	0	162	86.4	32.9218	1.9718	1	1	1	1	1	0	0	1	0	0	0	1	0	1	0	0	0	0	0	0	0	0	0	0	0	2	0	2	0	0	0	0	0	0	0	6	5	19	82	3	0	1	0	0
77.509	1	191	120.4	33.0035	2.52743	1	0	0	0	0	0	1	1	0	0	0	1	1	1	0	0	0	1	0	0	0	0	0	0	0	2	0	0	0	0	0	0	0	0	0	6	4	12	113	10	1	1	0	0
78.1341	1	170	91	31.4879	2.07297	0	0	0	0	0	0	0	1	0	0	0	0	0	0	0	0	0	0	0	0	0	0	0	0	0	2	0	0	0	0	0	0	0	0	0	0	4	6	139	15	0	0	0	0
80.3077	1	174	111.5	36.8279	2.32146	0	1	0	0	0	0	0	0	0	0	0	0	0	0	0	0	0	0	0	0	0	0	0	0	0	0	0	0	0	0	0	0	0	0	0	0	5	6	128	13	0	0	0	0
74.1221	0	168	84.9	30.0808	1.99048	1	0	1	1	0	0	0	1	0	0	0	0	0	0	0	0	0	0	0	0	0	0	0	0	0	0	0	0	0	0	0	0	0	0	0	0	4	4	71	7	1	1	0	0
43.9315	0	178	55.1	17.3905	1.65057	0	0	0	0	0	0	0	0	0	0	0	0	0	0	0	0	0	0	0	0	1	0	0	0	0	0	0	2	0	0	0	0	0	2	0	0	1	5	50	3	0	0	0	0
69.5594	1	185	96.4	28.1665	2.22573	0	0	0	0	0	0	0	0	0	0	0	1	0	1	0	0	0	1	0	0	0	1	0	0	0	0	0	0	0	0	0	0	0	0	3	0	3	7	125	16	1	1	0	1
67.9666	0	147	49.9	23.0922	1.42744	1	0	0	0	0	0	0	1	0	0	0	0	0	0	0	0	0	0	0	0	1	0	0	0	0	0	0	0	0	0	0	0	0	0	0	0	3	3	114	11	1	0	0	1
56.8446	1	175	88.4	28.8653	2.07297	0	0	0	0	0	0	0	0	0	0	0	0	0	0	0	0	0	0	0	0	0	0	0	0	0	0	0	0	0	0	0	0	0	0	0	0	2	2	125	16	1	0	0	1
90.074	0	152	73.7	31.8992	1.76402	0	1	1	0	0	0	0	0	0	0	0	0	0	0	0	0	0	0	0	0	1	0	0	0	0	0	0	0	0	0	0	0	0	0	0	0	6	7	96	6	0	1	0	0
73.7457	0	168	62.1	22.0026	1.70235	1	0	0	0	0	0	0	1	1	0	0	1	0	1	0	0	0	0	0	0	1	0	0	1	0	0	0	0	0	0	0	0	1	0	0	0	4	6	95	10	0	1	0	0
58.6104	0	161	58	22.3757	1.61056	0	0	0	0	0	0	0	0	0	0	0	0	0	0	0	0	0	0	0	0	0	0	0	0	0	0	0	0	0	0	0	0	0	0	0	0	2	3	137	18	0	1	0	0
91.1419	0	152	45.7	19.7801	1.38908	1	0	0	0	0	0	0	0	0	0	0	0	0	0	0	0	0	0	0	0	0	0	0	1	1	2	0	0	0	0	0	0	1	0	0	0	6	11	93	9	1	1	0	1
74.5838	0	153	78.6	33.5768	1.8277	0	0	0	0	1	0	0	0	0	0	0	0	0	0	0	1	1	0	0	0	0	0	0	1	0	0	0	0	0	0	0	0	0	0	0	0	4	7	79	8	1	1	0	1
85.5496	0	149	58.5	26.3502	1.55604	0	0	0	0	0	0	0	0	0	0	0	0	0	0	0	0	0	0	0	0	0	0	0	0	0	0	0	0	0	0	0	0	0	0	0	0	5	5	71	5	0	0	0	0
72.9689	0	173	102.2	34.1475	2.21614	0	0	1	0	0	0	0	0	0	0	0	1	1	1	0	1	1	0	0	0	0	0	1	1	0	0	0	0	0	0	0	0	0	0	0	0	4	8	80	10	1	1	0	1
83.4454	0	155	40.8	16.9823	1.32539	1	0	1	0	1	0	1	0	0	0	0	1	0	1	0	0	0	0	0	0	0	0	0	0	0	0	0	0	0	0	0	0	0	0	0	0	5	7	73	6	0	1	0	1
88.463	0	152	72.3	31.2933	1.74719	1	0	1	1	0	0	1	0	1	0	1	1	1	1	1	0	0	0	0	0	1	0	0	0	0	0	0	0	0	0	0	0	0	0	0	0	5	6	89	10	0	0	0	1
96.995	1	177.5	64.4	20.4404	1.78193	1	0	1	1	0	0	1	1	0	0	1	0	0	0	0	0	0	0	0	0	0	0	0	1	0	2	0	0	0	0	0	0	0	0	0	6	6	17	109	11	0	1	1	1
65.8975	0	155	86.2	35.8793	1.9265	1	1	0	0	0	0	0	0	0	0	0	0	0	0	0	1	1	0	0	0	0	0	0	0	0	0	0	0	0	0	0	0	0	0	0	0	3	6	121	10	0	1	1	1
66.5033	1	169	102.9	36.0282	2.19786	1	1	0	0	0	0	0	0	0	0	0	0	0	0	0	0	0	1	0	0	0	0	0	0	1	2	0	0	0	0	0	0	0	0	0	0	3	8	95	11	1	1	1	1
77.5369	1	181	123.3	37.6362	2.48983	1	0	0	1	0	0	1	0	1	0	0	0	0	0	1	1	1	0	0	0	0	0	0	0	1	0	0	0	0	0	0	0	0	0	0	0	4	8	98	6	0	1	0	1
86.1031	0	147	43.2	19.9917	1.32816	1	0	1	1	0	0	0	0	0	0	0	0	0	0	0	0	0	0	0	0	0	0	0	0	1	2	0	0	0	0	0	0	0	0	0	0	5	9	58	7	0	1	0	1
88.8616	1	156	92.2	37.8863	1.99883	1	1	0	0	1	0	0	1	0	0	0	0	0	0	0	1	1	0	0	0	1	0	1	0	0	0	0	0	0	0	0	0	0	0	0	0	5	10	105	9	0	0	0	0
89.4401	0	170	68.9	23.8408	1.80378	1	0	0	0	0	0	0	0	0	0	0	0	0	0	0	0	0	0	0	0	0	0	0	0	0	0	0	0	0	0	0	0	0	0	0	0	5	7	101	10	1	0	0	0
52.5475	0	167	53.2	19.0756	1.57095	0	0	1	0	0	1	0	1	0	0	0	1	1	1	0	1	1	1	0	0	0	0	0	1	0	2	0	0	0	0	1	0	0	0	0	6	2	12	56	4	1	1	0	0
69.307	1	186	79.8	23.0663	2.03052	1	0	1	1	0	1	1	1	1	1	0	1	1	1	1	0	0	0	0	0	0	0	0	0	0	2	0	0	0	0	0	0	0	0	0	6	3	11	55	4	0	0	0	0
63.8075	0	162.5	43.8	16.587	1.40609	1	0	1	1	0	0	0	1	0	0	1	0	0	0	0	1	1	0	0	0	0	0	0	0	0	0	0	0	0	0	0	0	1	0	0	0	3	7	110	11	1	1	0	1
72.0645	0	160	55.9	21.8359	1.57621	1	0	1	0	1	0	1	0	0	0	0	0	0	0	0	0	0	0	0	0	1	0	0	0	0	2	0	0	0	0	0	0	1	0	0	0	4	9	109	10	0	1	0	1
78.242	1	190.5	94.6	26.0676	2.23739	1	0	0	0	0	0	0	1	1	1	0	1	0	1	0	0	0	0	0	0	0	0	0	0	0	0	0	0	0	0	0	0	0	0	0	0	4	5	72	2	0	0	0	0
75.1833	0	160.5	94.2	36.568	2.04933	0	0	0	0	0	0	1	1	0	0	0	0	0	0	0	0	0	0	0	0	0	0	0	0	0	2	0	0	0	0	0	0	0	0	0	0	4	6	104	10	0	0	0	1
77.5406	0	163	156.9	59.0538	2.66535	1	1	1	0	0	0	1	1	0	0	0	1	0	1	0	0	1	0	0	0	1	0	0	0	0	0	0	0	0	0	1	0	1	0	0	0	4	8	74	6	0	0	1	0
82.5889	0	156	54.5	22.3948	1.53677	1	0	0	0	0	0	1	0	0	0	0	0	0	0	0	1	1	0	0	0	0	0	0	0	0	2	0	0	0	1	1	0	0	0	0	0	5	8	98	7	0	0	0	0
80.9335	0	147.3	55	25.3488	1.50014	1	0	0	0	0	1	0	0	1	0	0	0	0	0	0	1	1	0	0	0	0	0	0	0	0	0	0	0	0	0	0	0	1	0	0	0	5	7	121	15	1	1	0	1
58.733	1	180	111.8	34.5062	2.36432	1	1	1	1	0	1	0	1	0	0	0	1	1	1	1	1	1	1	0	0	0	0	0	0	0	0	0	2	0	0	1	0	1	0	0	0	2	11	75	6	0	1	0	0
86.8114	1	183	110.7	33.0556	2.37218	0	0	0	0	0	0	0	0	0	0	0	0	0	0	0	0	0	0	0	0	0	0	0	0	0	0	0	0	0	0	0	0	0	0	0	0	5	6	134	10	0	1	0	1
90.1382	0	160	62.6	24.4531	1.668	0	1	0	0	0	0	0	1	0	0	0	0	0	0	0	1	1	0	0	0	0	0	0	0	0	0	0	0	0	0	0	0	0	0	0	0	6	9	115	12	1	0	0	1
59.0786	0	152.4	120.5	51.882	2.25858	1	1	1	0	0	0	0	1	0	0	0	1	1	1	1	1	1	1	0	0	0	0	1	0	0	2	0	0	0	0	0	0	0	0	0	0	2	7	52	9	1	0	0	0
76.5205	1	162	64.9	24.7295	1.70895	0	0	0	1	0	0	0	0	0	0	0	0	0	0	0	1	1	0	0	0	0	0	0	0	0	2	0	0	0	0	0	0	0	0	0	6	4	13	79	2	0	1	0	0
69.7348	0	148	48.6	22.1877	1.41351	1	0	1	0	1	0	0	1	0	0	0	1	1	1	1	0	1	0	0	0	0	0	0	0	0	0	0	0	0	0	1	0	0	0	0	0	3	6	70	3	0	0	0	0
79.1705	1	164	61.6	22.903	1.67518	1	0	0	1	0	0	1	0	0	0	0	1	0	1	0	1	1	0	0	0	0	0	1	0	0	2	0	2	0	0	0	0	1	0	0	0	4	12	105	8	1	0	0	1
85.3374	1	153	72.9	31.1419	1.76018	1	1	1	0	1	0	0	1	0	0	0	0	0	0	0	1	1	0	0	0	0	0	0	0	0	2	0	0	0	0	0	0	1	0	0	0	5	14	106	10	0	1	0	1
82.4605	1	175	85.2	27.8204	2.03511	0	0	0	0	0	0	0	1	0	0	0	0	0	0	0	0	0	0	0	0	0	0	0	0	0	0	0	2	0	0	0	0	0	0	0	0	5	8	63	3	0	0	0	0
102.238	1	160	54.7	21.3672	1.5592	1	0	0	0	0	0	1	1	0	0	0	1	0	1	0	1	1	0	0	0	0	0	0	1	0	0	0	0	0	0	0	0	0	0	0	0	7	10	70	6	0	1	0	0
69.1531	1	174	72.3	23.8803	1.86936	0	0	0	0	0	0	0	0	0	0	0	0	0	0	0	0	0	1	0	0	0	0	0	0	0	2	0	0	0	0	0	0	0	0	0	0	3	5	77	7	1	1	0	1
50.9004	0	165	87.9	32.2865	2.00717	1	0	1	0	0	0	0	0	0	0	0	0	0	0	0	0	0	0	0	0	0	0	0	0	0	0	0	0	0	0	0	0	0	0	0	0	2	3	87	12	0	1	0	0
71.1489	0	155	77.1	32.0916	1.82197	1	1	1	1	0	0	0	1	0	0	0	0	0	0	0	0	0	0	0	0	1	0	0	0	0	0	0	0	0	0	0	0	0	0	0	0	4	7	95	9	1	1	0	0
78.4629	0	157	54.1	21.9482	1.53602	1	0	0	1	0	0	1	1	0	1	0	1	1	1	0	1	1	0	0	0	0	0	0	1	0	0	0	0	0	0	0	0	0	2	0	0	4	9	88	9	0	1	0	0
84.8705	0	172	97	32.788	2.15278	1	1	0	0	0	0	1	0	0	0	0	0	0	0	0	0	0	0	0	0	0	0	0	1	0	2	0	0	0	0	0	0	0	0	0	0	5	9	90	8	1	1	0	1
81.6193	1	177.8	59.7	18.8847	1.71712	1	0	1	1	1	0	1	1	1	0	0	0	0	0	0	1	1	1	0	0	0	0	0	0	0	0	0	0	0	0	0	0	0	0	0	0	5	8	73	5	0	1	0	0
80.0457	0	167.6	50.2	17.8713	1.52875	1	0	1	1	0	0	1	1	1	0	0	0	0	0	0	1	1	0	0	0	0	1	0	0	0	2	0	0	0	0	0	0	1	0	0	0	5	12	101	9	1	1	0	1
54.7453	1	165	101	37.0983	2.15155	0	0	0	0	0	0	0	0	0	0	0	0	0	0	0	0	0	0	0	0	0	0	0	0	0	0	0	0	0	0	0	0	0	0	0	0	2	2	121	13	1	0	1	0
78.926	1	172	110	37.1823	2.2925	0	0	0	0	0	0	0	0	0	0	0	0	0	0	0	0	0	0	0	0	0	0	0	0	0	0	0	0	0	0	0	0	0	0	0	0	4	4	126	10	1	1	0	0
93.669	1	177.8	108.6	34.3531	2.31595	1	0	1	1	0	0	0	0	0	0	0	1	0	1	0	0	0	0	0	0	1	0	0	0	0	0	2	0	0	0	0	0	0	0	0	0	6	9	122	13	1	1	0	1
33.4634	0	169	51	17.8565	1.54731	1	0	0	0	0	0	0	1	0	0	0	1	0	1	0	0	0	1	0	0	0	0	1	0	0	0	0	0	0	1	0	0	1	0	0	0	0	3	73	13	1	0	0	1
51.1098	1	172	86.8	29.3402	2.03645	1	1	1	0	0	0	0	1	0	0	0	0	0	0	0	0	0	0	0	0	0	0	0	0	0	0	0	2	0	0	0	0	0	0	0	0	2	5	81	8	0	1	0	1
64.969	0	155	64.5	26.847	1.66646	1	0	0	0	0	0	0	1	0	0	0	0	0	0	0	0	0	0	0	0	1	0	0	0	0	0	0	2	0	0	0	0	0	0	0	0	3	5	66	7	0	0	0	0
66.3102	0	151	71	31.139	1.7257	0	0	0	1	0	0	0	0	0	0	0	0	0	0	0	1	1	0	0	0	0	0	0	0	0	0	0	0	0	0	0	0	1	0	0	0	3	7	85	6	0	0	0	0
63.1203	1	180	113.1	34.9074	2.37802	0	1	0	0	0	1	0	0	0	1	0	0	0	0	1	0	1	0	0	0	1	0	0	1	0	2	0	0	0	0	1	0	0	0	0	0	3	8	72	8	1	1	1	1
88.3838	0	156	52.2	21.4497	1.50399	1	0	1	1	1	0	1	1	1	1	1	0	0	0	0	0	0	0	0	0	1	0	0	1	0	2	0	0	0	0	0	0	0	0	0	0	5	11	95	8	0	0	0	0
82.3947	0	146	36.9	17.3109	1.22332	0	0	0	0	0	0	0	0	0	0	0	0	0	0	0	1	1	0	0	0	0	0	0	0	0	0	0	0	0	0	0	0	0	0	0	0	5	7	114	11	0	0	0	0
58.4625	1	179	148.3	46.2844	2.71548	1	1	1	1	0	0	0	0	0	0	0	1	1	0	1	1	1	0	0	0	0	0	0	0	0	0	0	0	6	1	1	0	0	0	0	0	2	12	94	12	0	1	1	1
59.1317	0	155	112.7	46.9095	2.20281	0	0	0	0	0	0	1	1	1	1	1	0	0	0	1	0	0	0	0	0	1	0	0	0	0	0	0	0	0	0	0	0	1	0	0	0	2	4	99	10	1	1	0	1
67.9741	1	170	60.4	20.8997	1.68885	0	0	0	0	1	0	0	0	0	0	0	0	0	0	0	0	0	0	0	0	0	0	1	0	0	0	0	0	0	0	0	0	0	0	0	0	3	5	81	6	1	1	0	1
79.3294	0	168	72.2	25.5811	1.83557	1	1	1	1	0	0	1	1	1	0	0	1	1	0	0	1	1	0	0	0	0	0	1	0	1	0	0	0	0	0	1	0	0	0	0	0	4	11	103	5	0	0	0	0
74.1162	1	163	63.7	23.9753	1.69829	1	1	1	1	0	0	0	0	0	0	0	0	0	0	0	0	1	0	0	0	0	0	0	0	0	0	0	0	0	0	1	0	0	0	0	0	4	8	71	8	1	1	0	1
82.02	1	175	84.6	27.6245	2.02793	0	0	0	1	0	0	1	1	0	1	0	0	0	0	1	0	0	0	0	0	0	0	0	0	0	0	0	0	0	0	0	0	0	0	0	0	5	7	92	10	1	1	0	1
89.6438	1	160	63.9	24.9609	1.68523	1	1	0	0	0	0	0	1	0	0	0	0	0	0	0	0	0	0	0	0	0	0	0	0	0	2	0	0	0	0	0	0	0	0	0	0	5	8	104	11	1	1	0	1
67.014	0	164	79.6	29.5955	1.90426	1	1	1	1	0	0	0	1	0	0	0	0	0	0	1	1	1	0	0	0	1	0	0	0	0	0	0	0	0	0	0	0	1	0	0	0	3	7	119	11	1	1	1	0
72.3921	0	162	69.1	26.3298	1.76338	1	1	1	1	1	1	1	1	1	1	1	0	0	0	1	0	0	0	0	0	0	0	1	1	0	2	0	0	0	0	0	0	0	0	0	0	4	12	109	8	1	0	0	1
82.3478	0	155	73.3	30.5099	1.77651	0	0	0	0	0	0	0	0	0	0	0	0	0	0	0	0	0	0	0	0	0	0	0	0	0	0	0	0	0	0	0	0	0	0	0	0	5	6	86	11	0	0	0	1
88.5215	1	177	96	30.6425	2.17256	0	0	0	0	0	0	1	0	0	0	0	0	0	0	0	1	1	0	0	0	0	0	0	0	0	0	0	0	0	0	1	0	0	0	0	0	5	7	137	15	0	1	0	1
88.985	1	175	67.6	22.0735	1.81276	1	0	0	0	0	0	0	0	0	0	0	0	0	0	0	0	0	0	0	0	0	0	0	0	0	0	0	2	0	0	0	0	0	0	0	0	5	7	115	8	1	1	0	1
91.7257	0	151	71.53	31.3714	1.73213	1	0	1	0	0	0	1	1	0	0	0	0	0	0	0	0	0	0	0	0	0	0	0	1	1	0	0	0	0	0	0	0	0	0	0	0	6	8	143	9	0	1	1	1
59.1095	0	163	119	44.789	2.32122	0	1	1	0	0	0	0	0	0	0	0	0	0	0	0	1	1	0	0	0	0	0	1	0	0	2	0	0	0	0	0	0	0	0	0	0	2	9	74	7	0	0	0	0
93.8466	1	162	72.2	27.5111	1.8025	1	1	1	1	0	0	0	1	1	1	0	1	0	1	0	1	1	0	0	0	0	0	0	1	0	0	0	0	0	0	0	0	0	0	0	0	6	11	78	7	0	0	0	0
76.7408	1	179	94	29.3374	2.16192	0	0	0	0	0	0	0	0	0	0	0	1	1	0	0	0	0	0	0	0	0	0	0	0	0	2	0	0	0	0	0	0	0	0	0	0	4	7	100	8	0	0	0	0
78.5698	1	177.8	103.7	32.8031	2.2631	1	1	0	0	0	0	1	0	0	0	0	0	0	0	0	0	0	0	0	0	0	0	0	1	0	0	0	0	0	0	0	0	1	0	0	0	4	7	80	7	0	1	0	0
79.1944	1	176	86	27.7634	2.05047	0	0	1	0	0	0	0	1	0	0	0	0	0	0	0	1	1	0	0	0	0	0	0	0	0	2	0	0	0	0	0	1	0	0	0	6	4	14	73	5	0	1	0	0
84.2793	1	178	76.1	24.0184	1.93977	0	0	0	0	0	0	0	0	0	0	0	0	0	0	0	0	0	0	0	0	0	0	0	0	0	0	2	0	0	0	0	0	0	0	0	0	5	7	77	8	0	1	0	0
84.3575	1	168	73	25.8645	1.84572	0	0	1	1	0	0	1	1	0	0	0	0	0	0	0	0	0	0	0	0	0	0	1	0	0	0	0	0	0	0	0	0	0	0	0	0	5	7	148	12	1	0	0	1
82.458	0	168	74.3	26.3251	1.86208	1	1	1	1	1	0	1	1	0	0	0	0	0	0	0	0	0	0	0	0	0	0	0	0	0	0	0	0	0	0	0	0	0	0	0	0	5	8	137	13	1	0	0	0
72.4977	0	167	97	34.7807	2.12125	0	0	0	0	0	0	0	0	0	0	0	0	0	0	0	1	1	0	0	0	0	0	0	0	0	2	0	0	0	0	0	0	0	0	0	6	4	14	90	3	0	1	0	0
86.1732	0	168	92.3	32.7027	2.07541	0	0	0	0	0	0	1	0	0	0	0	0	0	0	0	0	0	0	0	0	0	0	0	0	1	0	0	0	0	0	0	0	0	0	0	0	5	6	90	6	0	0	0	0
84.2181	0	153	85.2	36.3963	1.90289	1	1	1	0	0	0	1	1	0	0	0	1	0	1	0	0	0	0	0	0	0	0	0	0	0	0	0	0	0	0	0	0	0	0	0	0	5	6	151	17	1	1	0	0
96.0291	0	163	67.4	25.3679	1.74692	1	1	1	1	0	0	0	1	1	0	0	0	0	0	0	0	0	0	0	0	1	0	1	0	0	0	0	0	0	0	0	0	0	0	0	0	6	9	92	9	1	0	0	0
81.8026	0	167	77.9	27.9322	1.90097	0	0	0	0	0	0	1	0	0	1	1	1	0	1	0	0	0	0	0	0	0	0	0	0	0	0	0	0	0	0	0	0	0	0	0	0	5	6	60	6	0	0	0	0
74.0188	1	170	82.6	28.5813	1.97498	1	0	1	0	1	0	0	1	1	0	1	0	0	0	0	1	1	1	0	0	1	0	0	1	1	2	0	0	0	1	0	0	1	0	0	0	4	11	75	4	0	1	0	0
85.1871	0	177	100.9	32.2066	2.22731	0	0	0	0	0	0	0	0	0	0	0	0	0	0	0	0	0	0	0	0	0	0	0	0	0	0	0	0	0	0	0	0	0	0	0	0	5	6	68	6	0	1	0	0
90.048	1	173	84.6	28.2669	2.01631	0	0	0	1	0	0	1	1	0	0	0	0	0	0	0	0	0	0	0	0	1	0	0	0	0	0	0	0	0	0	0	0	0	0	0	0	6	6	82	10	0	1	0	0
58.0869	1	170	68	23.5294	1.79196	0	0	0	0	0	0	0	0	0	0	0	0	0	0	0	0	0	0	0	0	0	0	0	0	0	0	0	0	0	0	0	0	0	0	0	0	2	2	103	14	0	1	0	1
61.5004	0	175.3	155.5	50.6019	2.75172	1	1	1	0	0	0	0	1	0	0	0	0	0	0	1	0	1	0	0	0	0	0	0	0	0	0	0	0	0	0	1	0	0	0	0	0	3	5	89	9	0	1	0	0
78.9483	1	180	67.4	20.8025	1.83576	1	0	1	0	0	0	0	0	0	0	0	0	0	0	0	1	1	0	0	0	0	0	0	0	0	0	0	0	0	0	0	0	0	0	0	0	4	6	78	8	0	1	0	0
86.2828	1	169	77.9	27.275	1.91232	1	0	0	1	0	0	1	0	1	1	1	0	0	0	0	0	0	0	0	0	1	0	0	0	0	0	0	0	0	0	0	0	0	0	0	0	5	7	80	6	0	1	0	1
87.5995	1	185	68.5	20.0146	1.8762	0	0	0	0	0	1	0	0	0	1	0	0	0	0	0	0	0	0	0	0	0	0	0	0	0	2	0	0	0	0	0	0	0	0	0	0	5	7	72	6	0	0	0	0
88.7349	0	157	48.2	19.5545	1.44985	0	1	0	1	0	0	0	1	0	0	0	1	0	1	0	0	0	0	0	0	0	0	0	0	0	0	0	0	0	0	0	0	0	0	0	0	5	6	136	14	0	0	0	1
79.6559	0	165	115.4	42.3875	2.29982	1	1	1	1	0	0	0	0	0	0	0	1	0	1	1	0	1	0	0	0	0	0	0	1	0	0	0	0	0	0	0	1	0	0	0	0	4	9	95	8	0	0	0	0
71.3059	1	167	74.9	26.8565	1.86401	1	1	1	1	0	0	0	0	0	0	0	0	0	0	0	1	1	0	0	0	0	0	0	1	1	0	0	0	0	0	0	0	0	0	0	0	4	11	74	7	0	1	0	1
72.4703	1	172.7	82.6	27.6946	1.9906	0	0	0	0	0	0	1	0	0	0	0	0	0	0	0	0	0	0	0	0	0	0	0	0	0	0	0	0	0	0	0	0	0	0	0	0	4	4	88	9	0	0	0	0
85.8642	1	173	93.6	31.274	2.12085	1	1	0	0	0	0	1	1	0	1	0	0	0	0	0	0	0	0	0	0	0	0	1	0	0	0	0	0	0	0	0	0	0	0	0	0	5	7	101	8	0	0	0	1
67.3677	1	180	102.7	31.6975	2.26605	0	0	0	1	0	0	0	0	0	0	0	0	0	0	1	0	0	0	0	0	0	0	0	0	0	2	0	2	0	0	0	0	0	0	0	6	3	14	85	8	0	0	0	0
72.748	1	174	82.2	27.1502	1.99324	1	1	1	1	0	0	0	0	0	0	0	1	0	1	0	0	0	0	0	0	0	0	0	0	0	2	0	0	0	0	0	0	0	0	0	0	4	7	91	6	0	0	0	0
70.8895	1	178	183	57.7579	3.00804	0	0	0	0	0	0	1	0	0	0	0	0	0	0	0	0	0	0	0	0	0	0	0	0	0	0	0	0	0	0	0	0	0	0	0	0	4	4	135	12	0	0	0	0
75.8022	0	155	107.1	44.5786	2.14738	1	1	0	0	0	0	0	0	0	0	0	0	0	0	0	1	1	0	0	0	0	0	0	0	1	2	0	0	0	0	1	0	0	0	0	0	4	10	97	7	0	1	0	1
43.135	1	187	250	71.4919	3.60362	0	1	0	0	0	0	0	0	0	0	0	0	0	0	0	1	1	0	0	0	0	0	0	0	0	0	0	0	0	0	1	0	0	0	0	0	1	6	87	11	0	1	0	0
76.7369	1	166	80.1	29.0681	1.92185	1	0	1	1	0	0	0	0	0	0	0	1	1	1	0	0	0	0	0	0	0	0	0	0	0	2	0	2	0	0	0	0	0	0	0	6	4	15	157	15	0	1	0	1
83.5532	0	147	79.7	36.8828	1.804	0	0	0	0	0	0	0	0	0	0	0	0	0	0	0	1	1	0	0	0	0	0	0	0	1	0	0	0	0	0	0	0	0	0	0	0	5	8	123	13	0	1	0	0
91.2944	1	180	76.2	23.5185	1.95192	1	0	1	0	0	0	1	0	0	0	0	0	0	0	1	0	0	0	0	0	0	0	0	0	0	0	0	0	0	0	0	0	0	0	0	0	6	7	93	12	1	0	0	0
68.6268	1	174	58.2	19.2231	1.6772	0	0	0	0	0	0	0	0	0	0	0	1	1	1	0	0	0	1	0	0	0	0	0	0	0	0	0	0	0	1	0	0	0	0	0	0	3	3	167	16	0	0	0	1
65.9133	1	170	120.9	41.8339	2.38939	0	1	0	0	0	0	0	0	0	0	0	0	0	0	0	0	0	0	0	0	0	0	0	0	0	0	0	0	0	0	0	0	0	0	0	0	3	5	68	6	0	1	0	0
70.3891	0	157.5	98.7	39.7884	2.07801	0	1	1	1	0	0	0	1	0	0	0	0	0	0	0	1	1	0	0	0	0	0	0	0	0	0	0	0	0	0	1	0	0	0	0	0	4	7	128	11	1	0	0	0
83.1087	0	150	92	40.8889	1.95789	1	0	1	0	0	0	0	1	0	0	0	1	0	1	0	0	0	0	0	0	0	0	0	0	0	2	0	0	0	0	0	0	0	0	0	0	5	7	122	11	1	0	0	0
86.7732	0	160	93.5	36.5234	2.03852	0	1	0	1	0	0	1	0	0	0	0	0	0	0	0	0	0	0	0	0	0	0	0	1	0	0	0	0	0	0	0	0	0	0	0	0	5	8	113	13	0	1	0	1
48.7953	0	160	121	47.2656	2.319	1	1	1	0	0	0	0	0	0	0	0	1	1	1	1	0	0	0	0	0	0	0	1	0	0	0	0	0	0	0	0	0	0	0	0	0	1	6	65	8	1	1	0	0
69.0271	1	172	109	36.8442	2.28206	1	1	0	1	0	0	1	0	0	0	0	0	0	0	0	0	0	0	0	0	0	0	0	0	0	0	0	0	0	0	0	0	0	0	0	0	3	5	155	17	1	1	0	1
65.52	1	181	81.7	24.9382	2.02674	0	1	0	1	0	0	1	1	0	1	1	0	0	0	0	1	1	0	0	0	0	0	0	0	0	0	0	0	0	0	0	0	0	0	0	0	3	7	159	14	1	1	0	1
44.1201	0	160	115.21	45.0039	2.26284	1	1	0	0	1	1	0	1	1	0	1	1	1	1	1	1	1	1	0	0	0	0	0	1	0	2	0	0	0	0	1	0	0	0	0	0	1	7	68	10	0	0	0	1
69.8287	1	177.5	127	40.3095	2.50236	1	0	0	0	0	0	0	0	0	0	0	0	0	0	1	0	0	0	0	0	1	0	0	0	0	2	0	0	0	0	0	0	0	0	0	6	3	11	107	14	1	1	0	0
38.589	0	164	93.1	34.6148	2.05942	1	0	0	0	0	0	0	0	0	0	0	1	0	1	0	0	0	0	0	0	0	1	0	0	0	0	0	0	0	1	0	0	1	0	0	0	0	2	84	11	0	0	0	0
86.8709	1	173	75.1	25.0927	1.89973	0	0	1	1	0	0	1	1	1	1	1	0	0	0	1	0	0	0	0	0	0	0	0	1	0	0	0	0	0	0	0	0	0	0	0	0	5	7	88	10	0	0	0	0
49.7682	1	180	72.1	22.2531	1.89868	0	0	0	0	0	0	0	1	0	0	0	1	0	1	0	0	0	0	0	0	0	1	0	0	0	2	0	0	0	0	0	0	0	0	3	6	1	13	148	13	0	1	0	0
59.3888	1	177	80.3	25.6312	1.98698	0	0	0	0	0	0	0	1	0	0	0	0	0	0	0	0	0	0	0	0	0	0	0	0	0	2	0	0	0	0	0	0	0	0	0	6	2	10	108	13	0	0	0	0
65.6488	1	180	100.3	30.9568	2.23942	1	0	1	1	0	0	0	0	0	0	0	0	0	0	1	0	0	0	0	0	0	0	1	0	0	0	0	0	0	0	0	0	0	0	0	0	3	4	71	10	0	0	0	0
49.39	1	182	182	54.9451	3.03333	0	1	1	1	0	0	0	0	0	0	0	0	0	0	0	0	0	1	0	0	0	0	0	0	0	0	0	0	0	1	0	0	0	0	0	0	1	3	115	14	0	1	0	1
[truncated: 160 more columns]
